# Supplementary material
Source: PubMed Central journal article supplement (PMC10786465)

# Figure 1—figure supplement 1

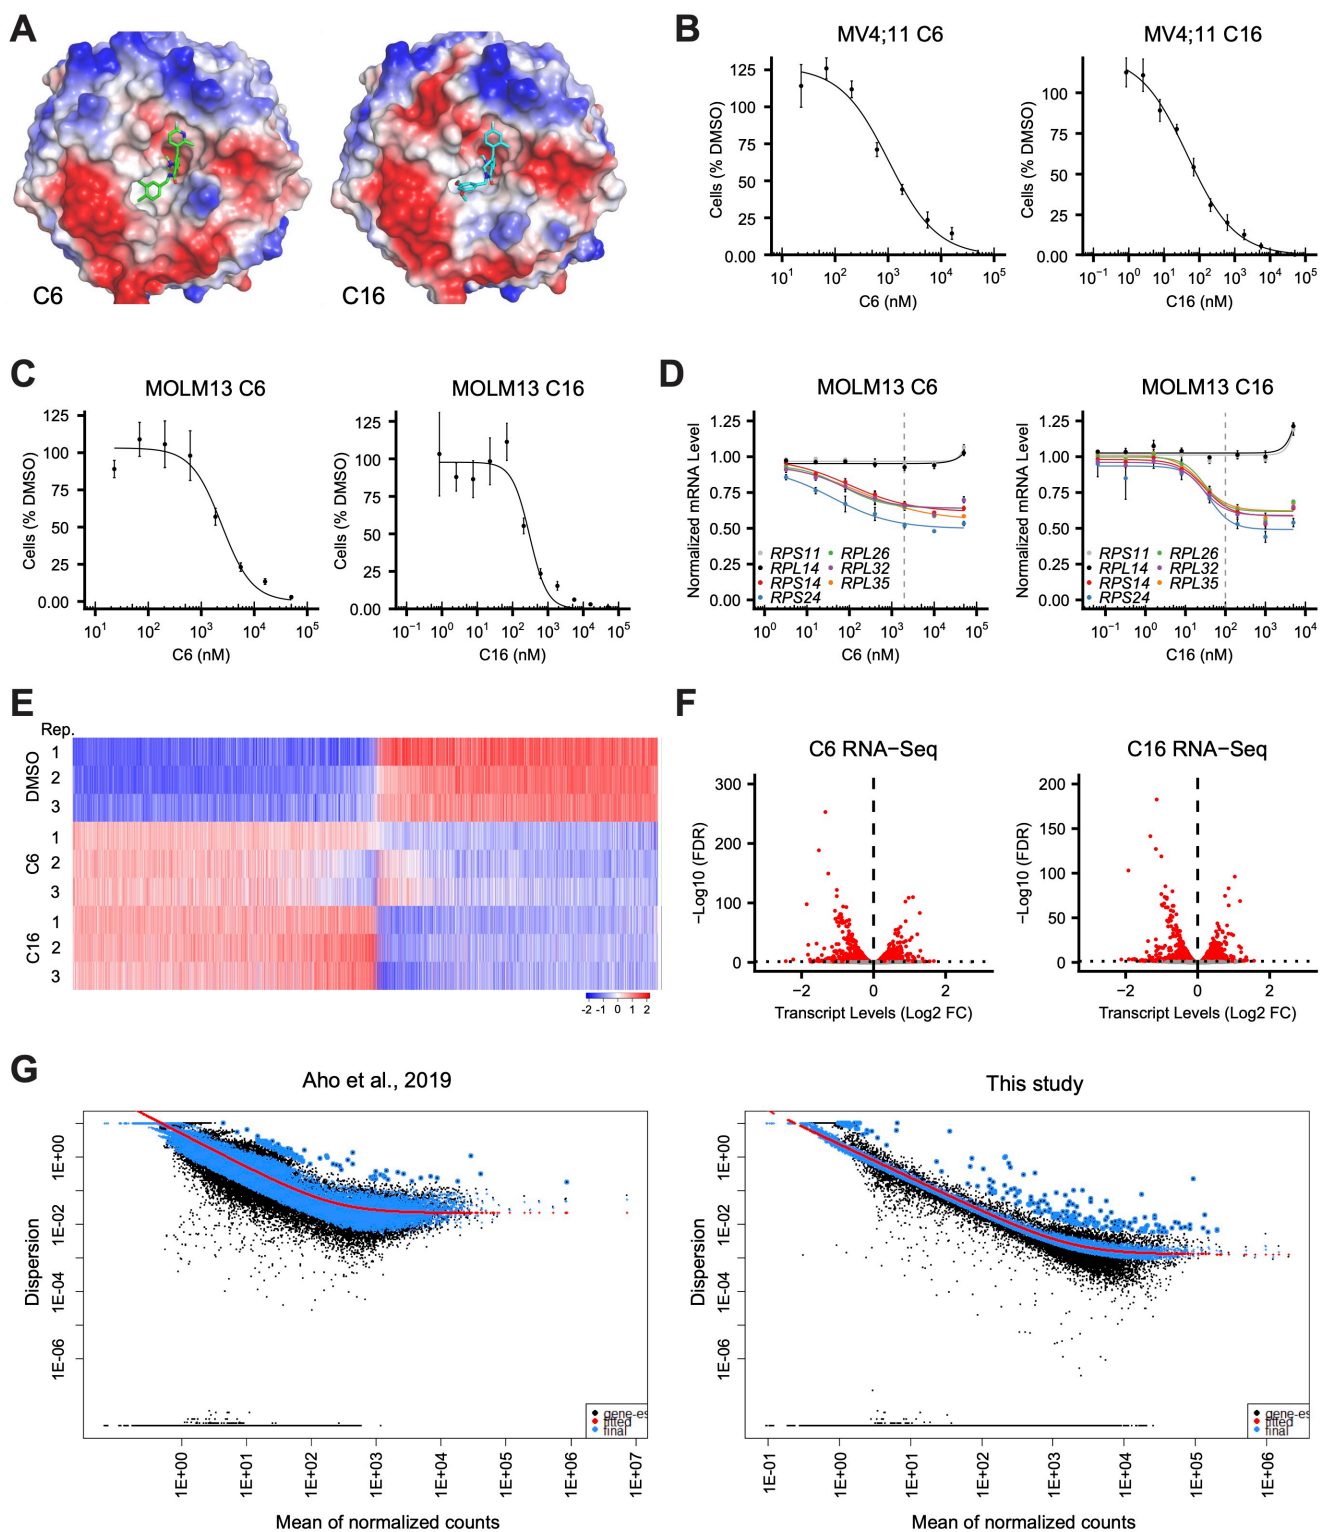

**Figure 1—figure supplement 2**

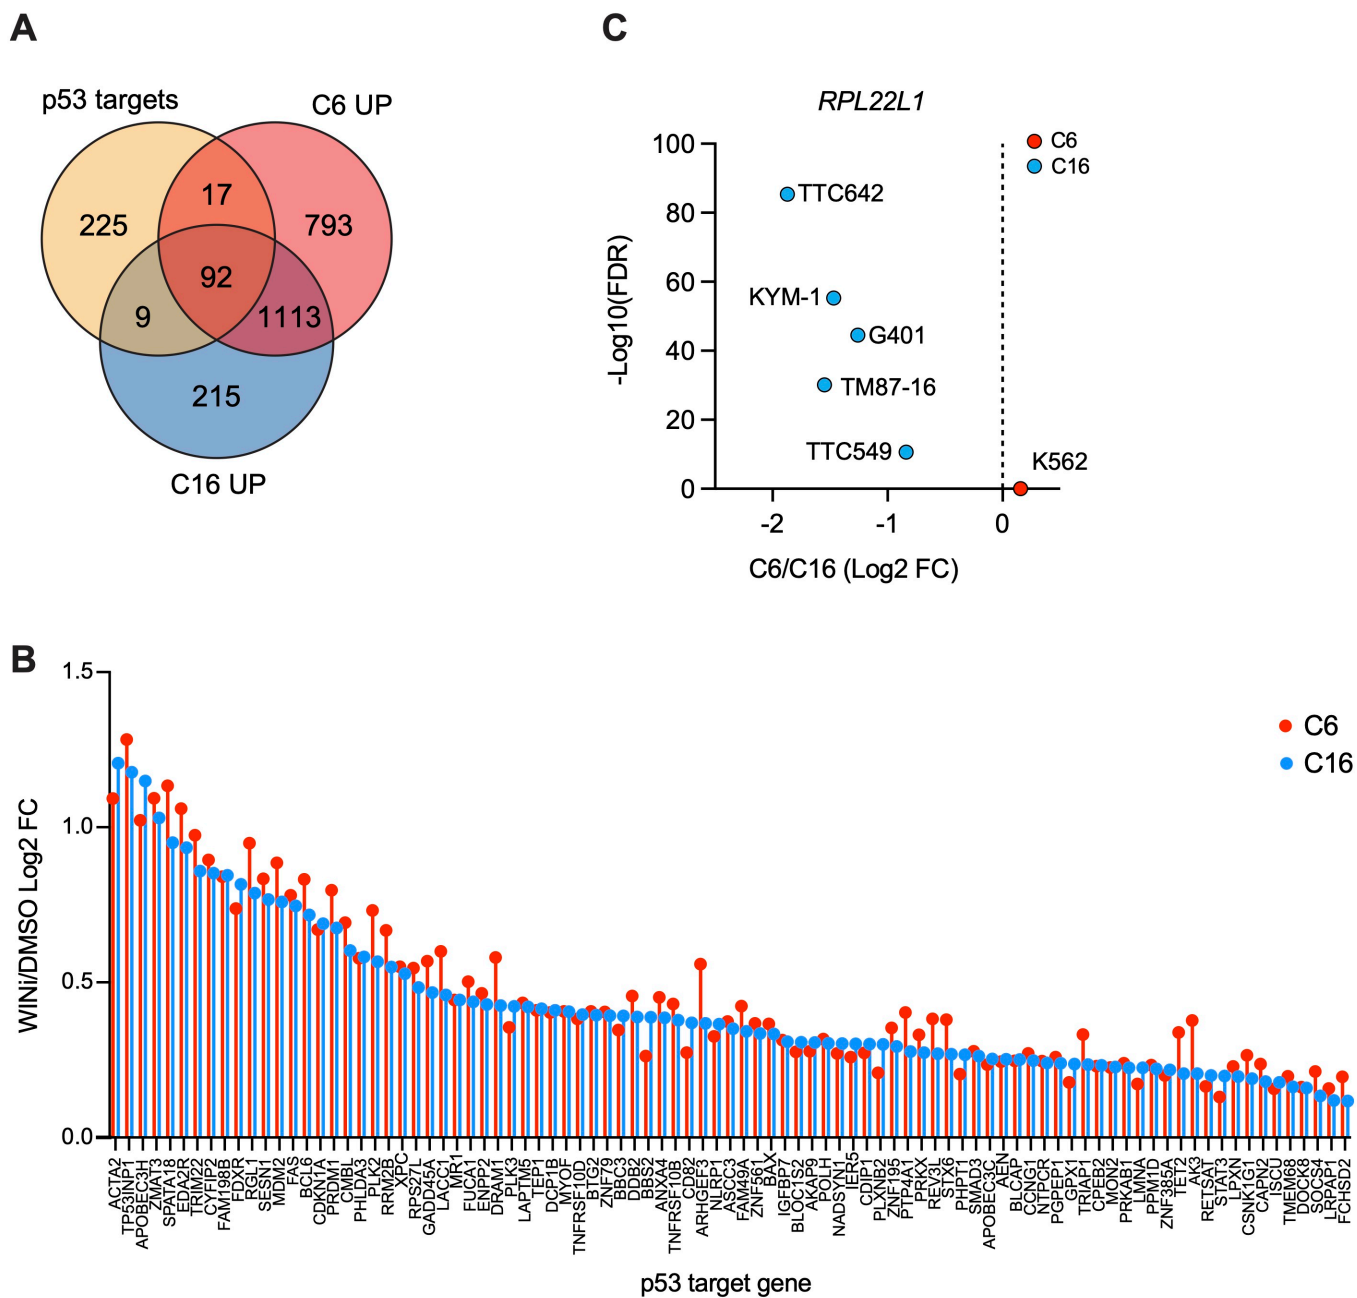

## Figure 2—figure supplement 1

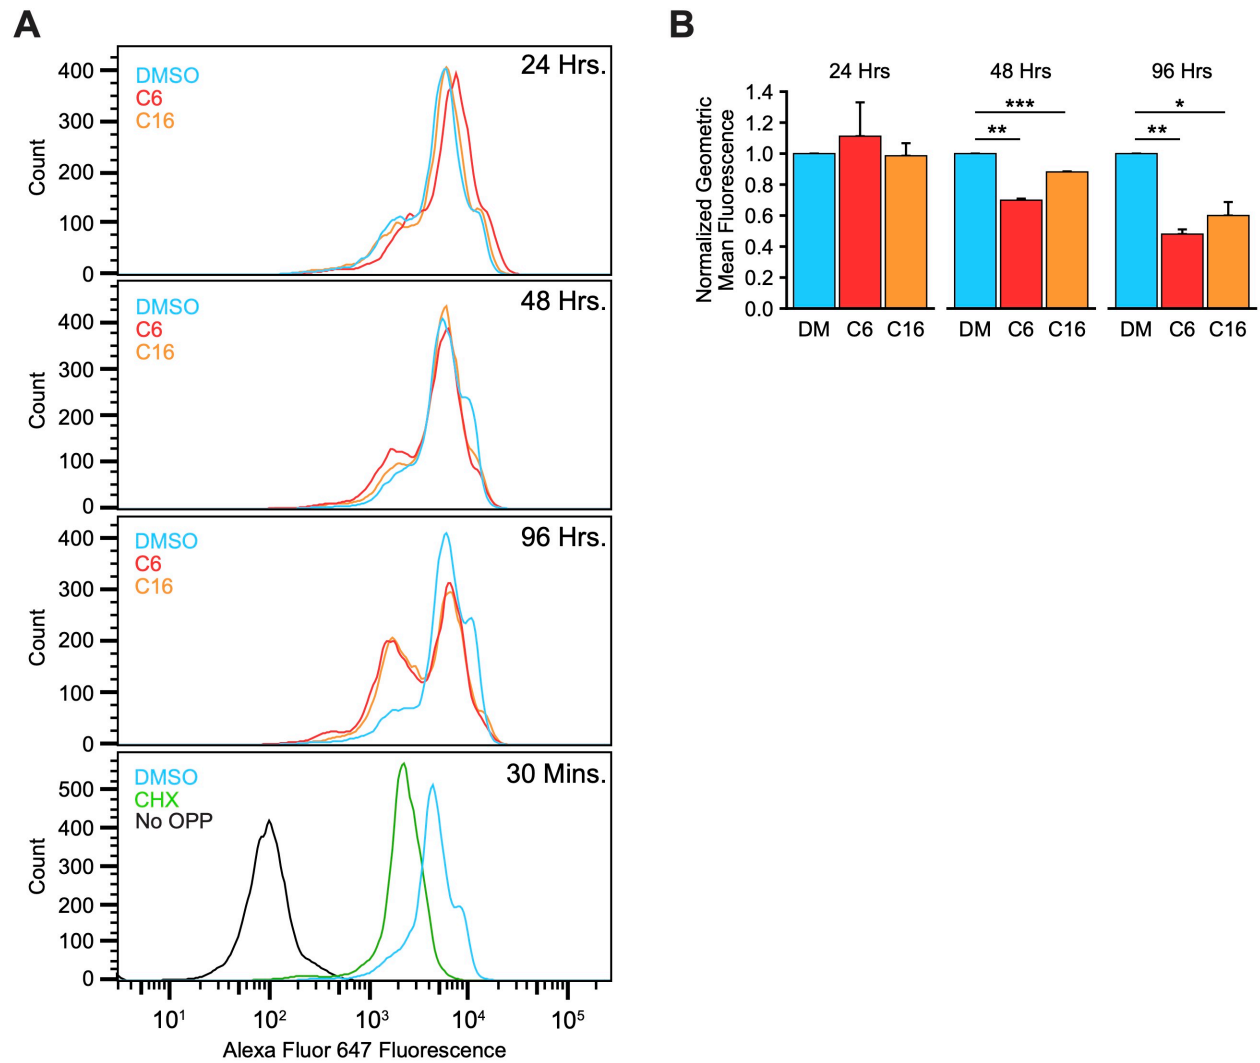

## Figure 2—figure supplement 2

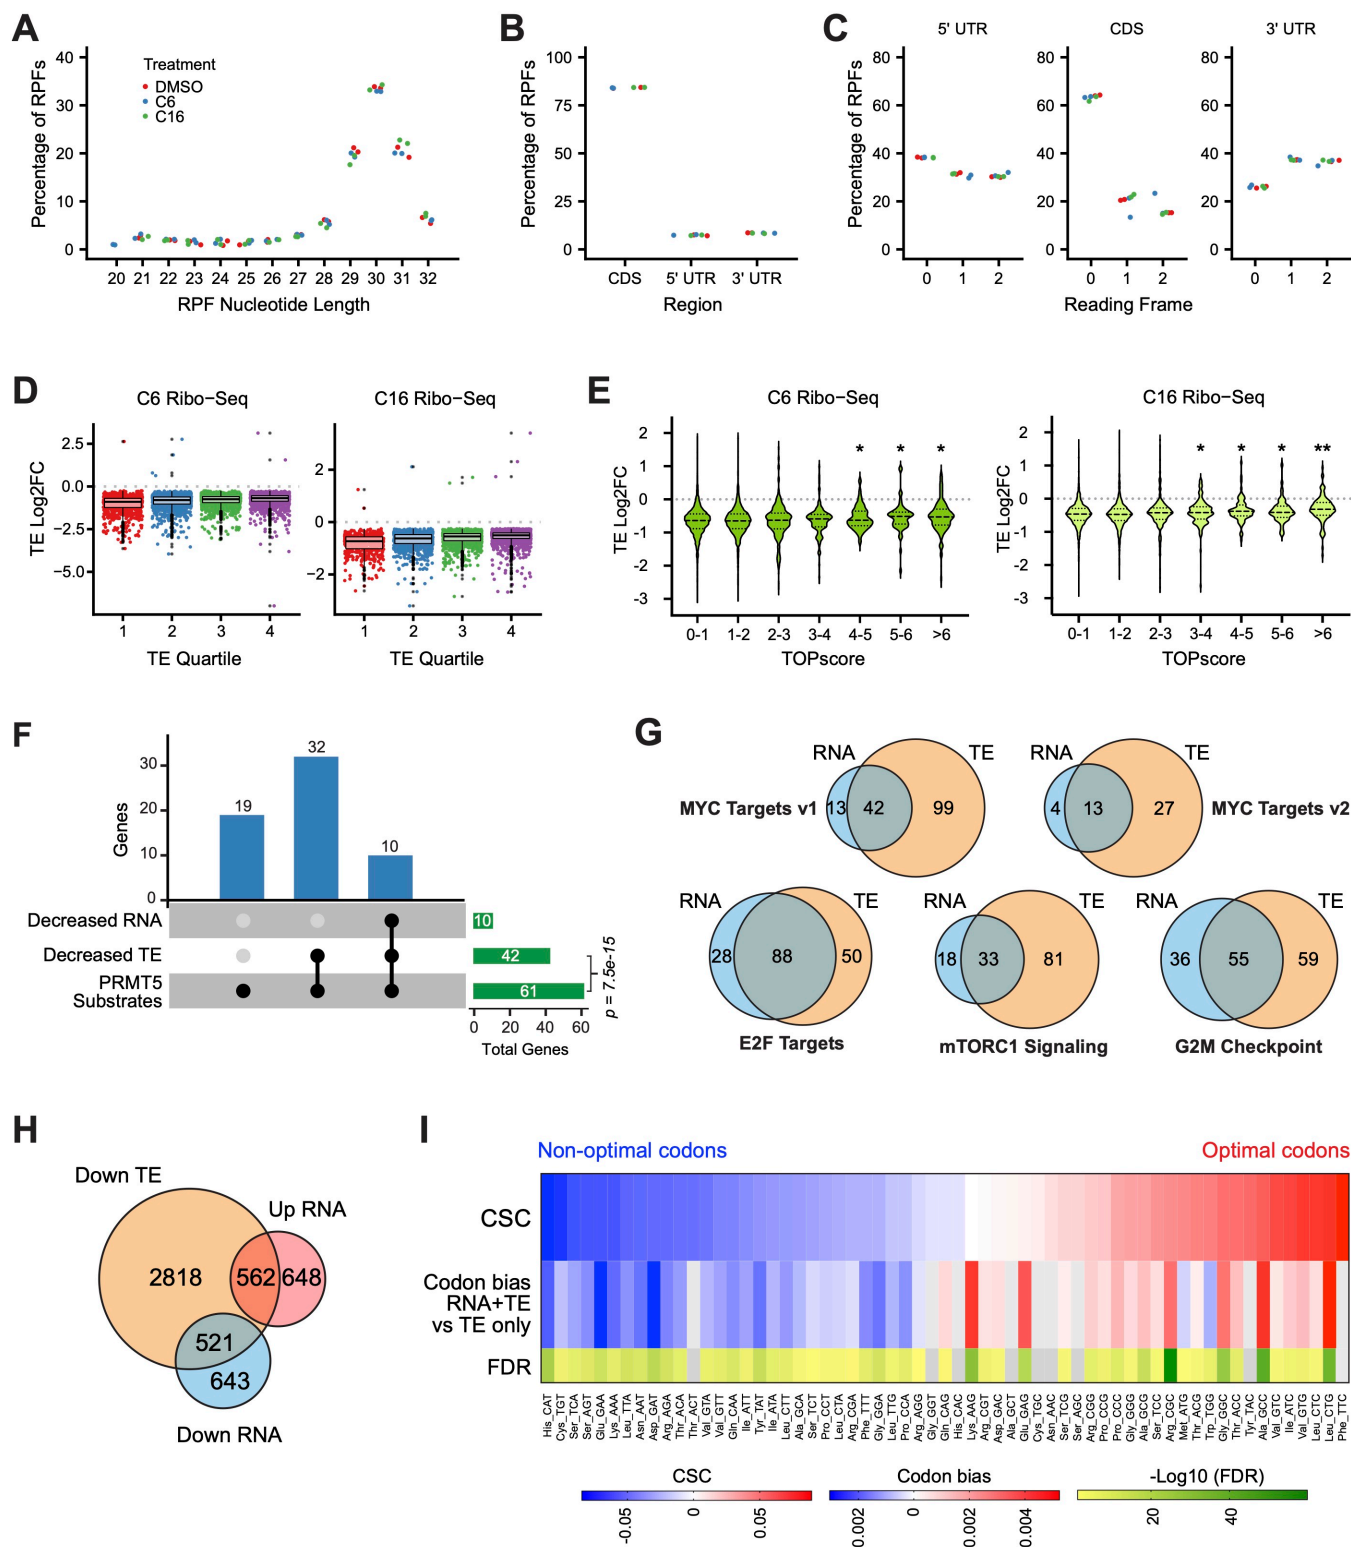



**Figure 2—figure supplement 3**

**A**

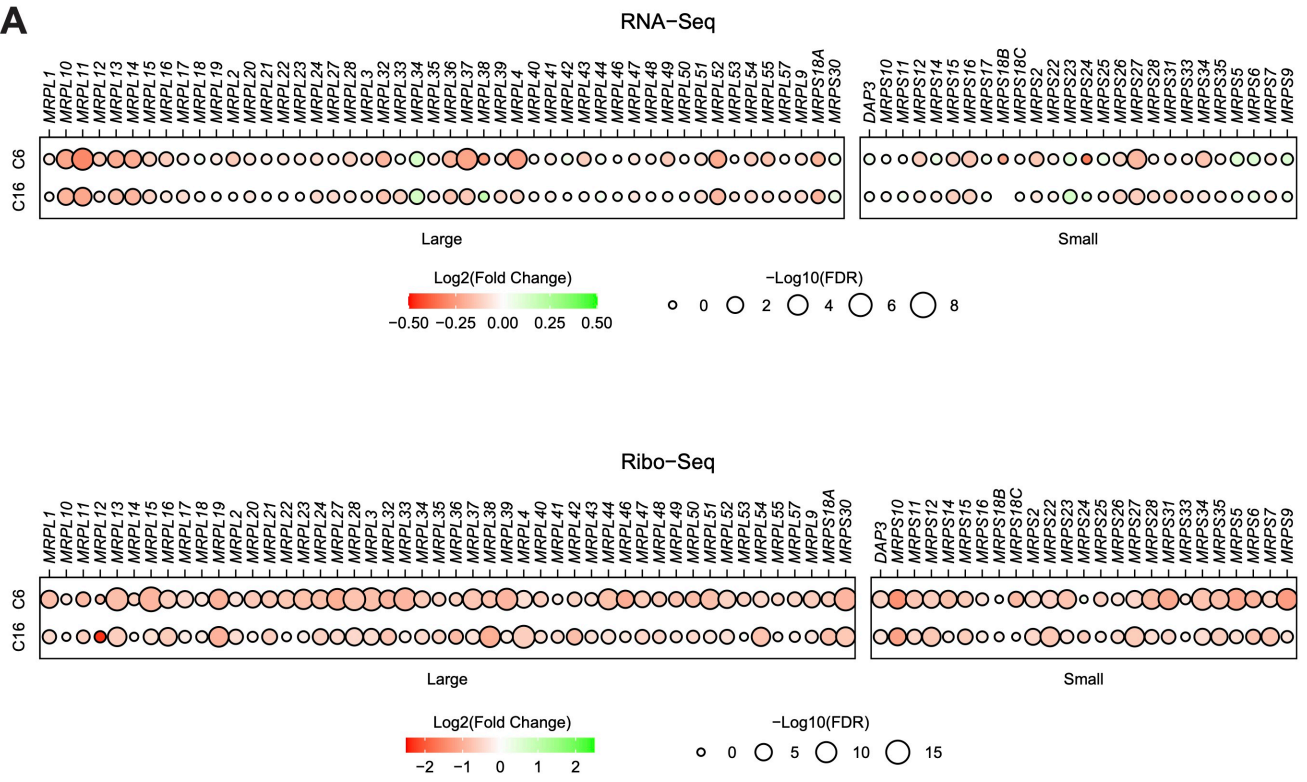

# Figure 3—figure supplement 1

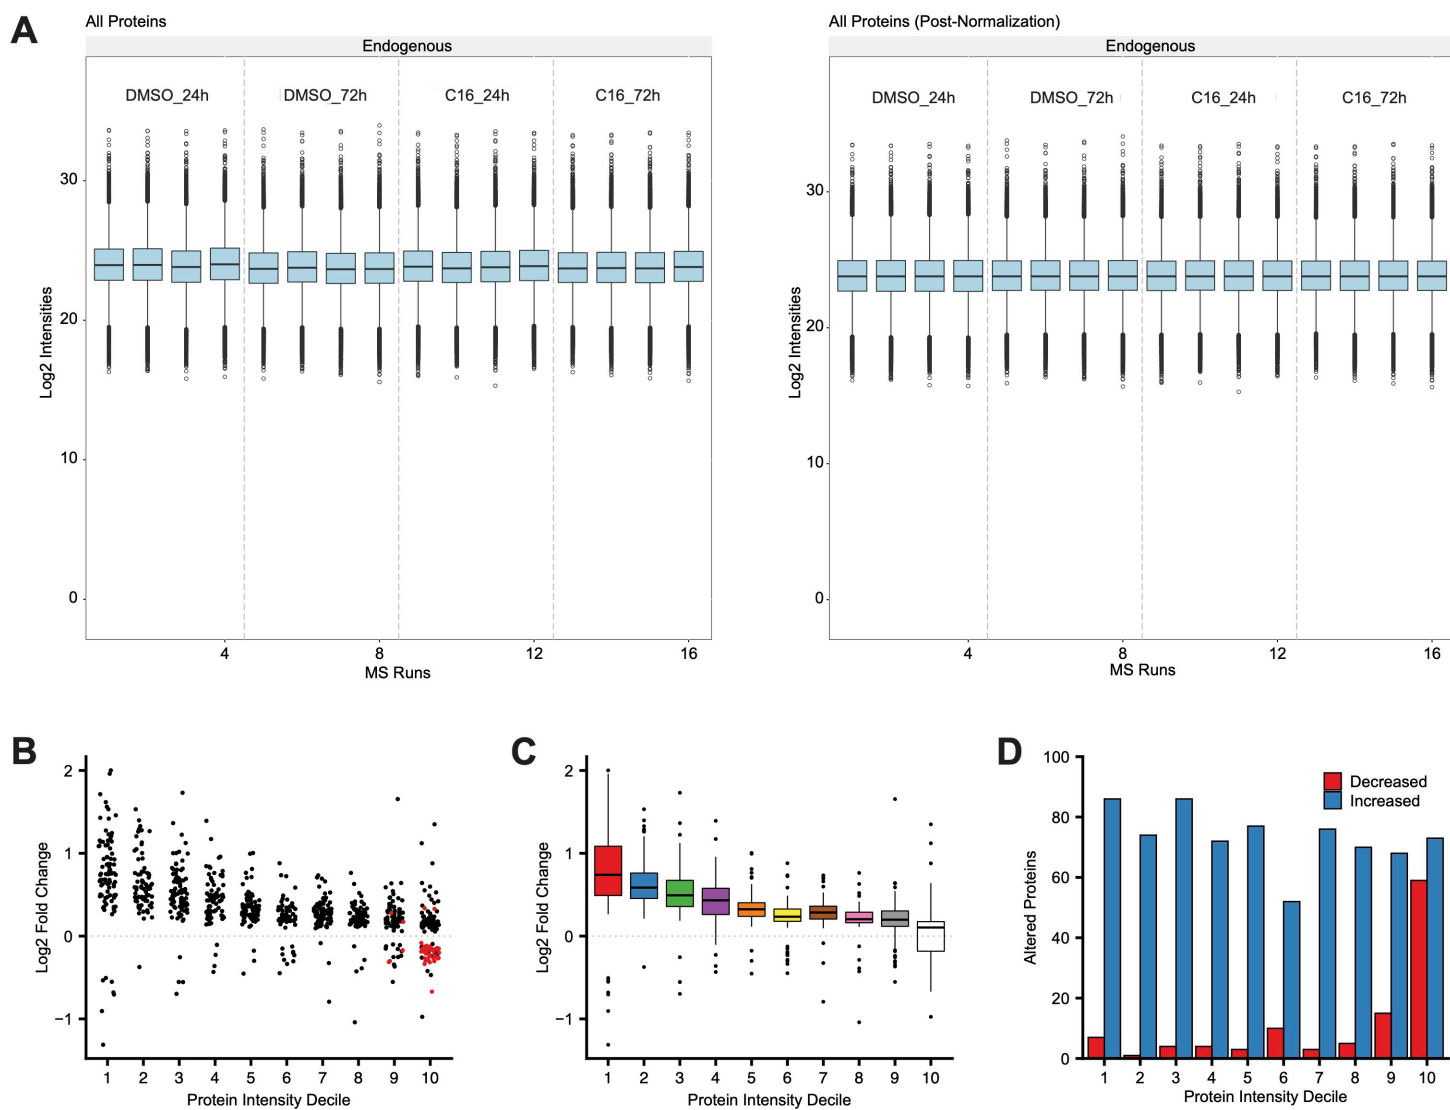

## Figure 3—figure supplement 2

**A**

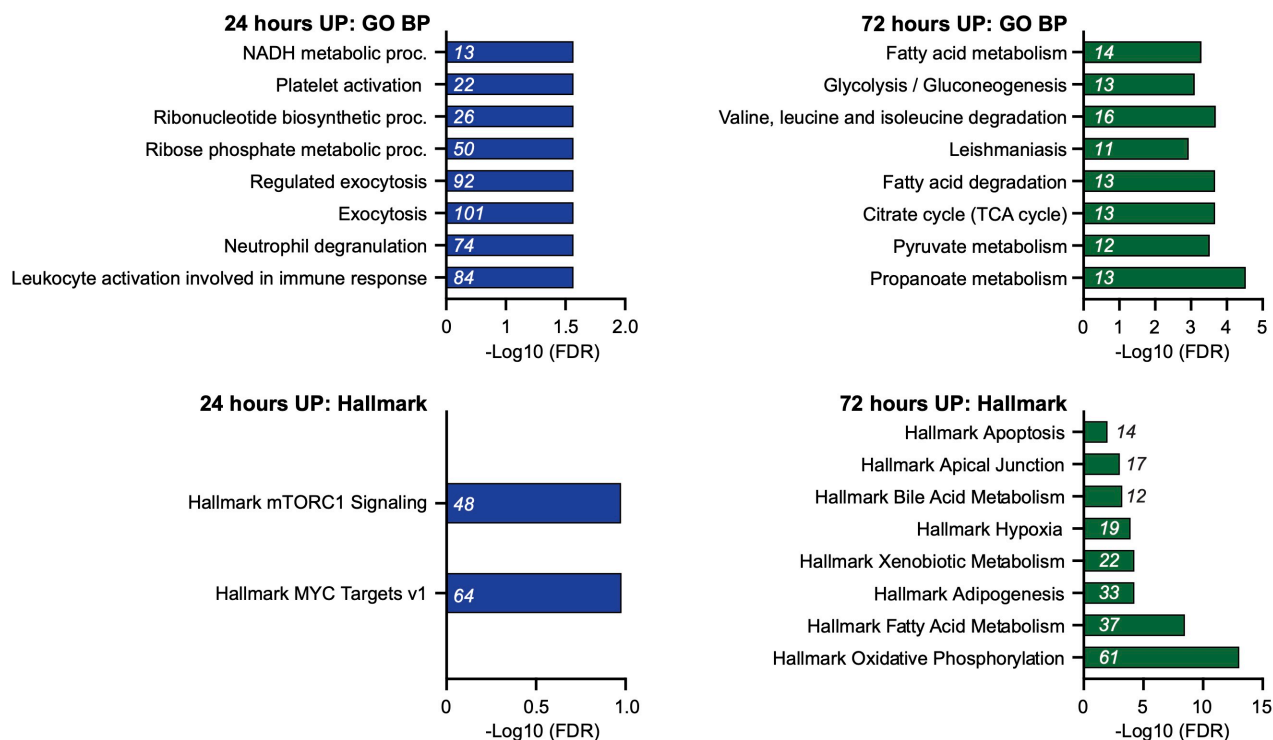

**B**

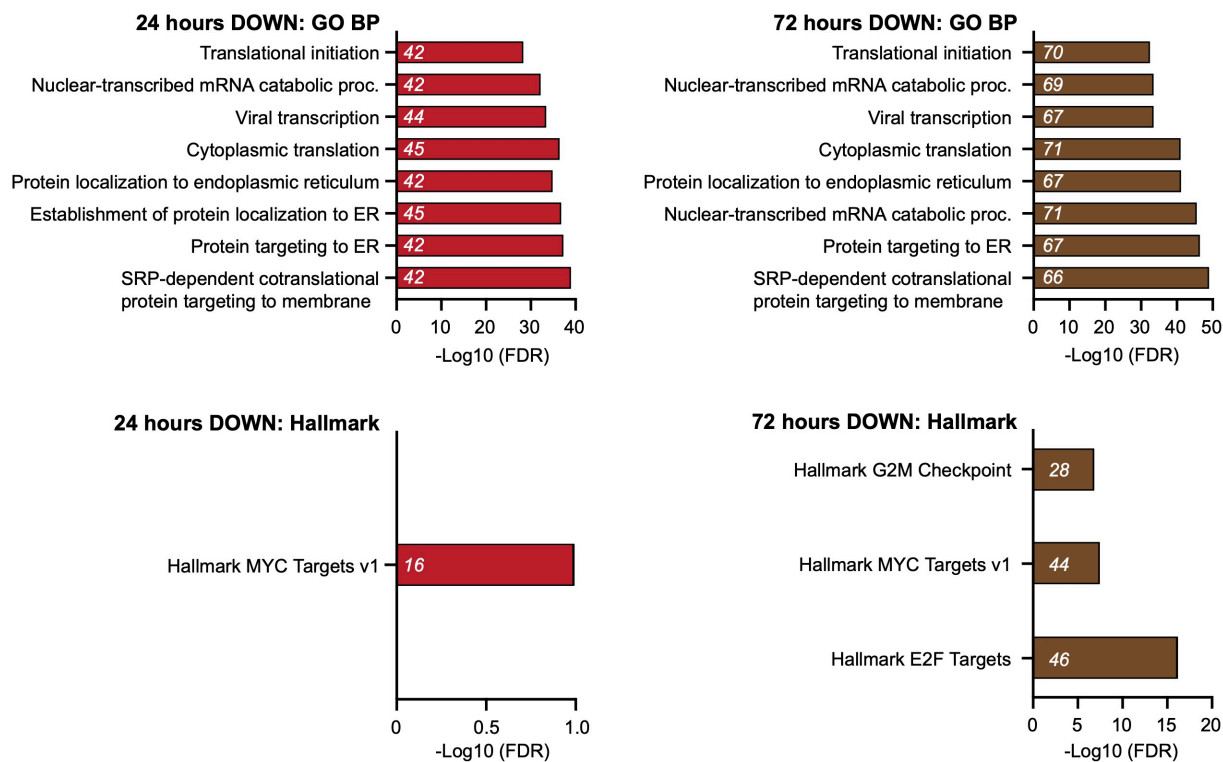

### Figure 3—figure supplement 3

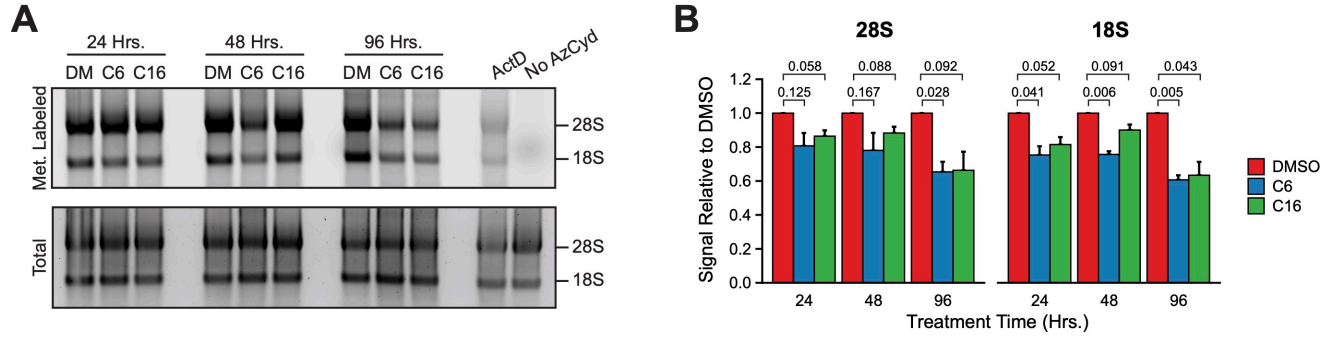

**Figure 3—figure supplement 4**

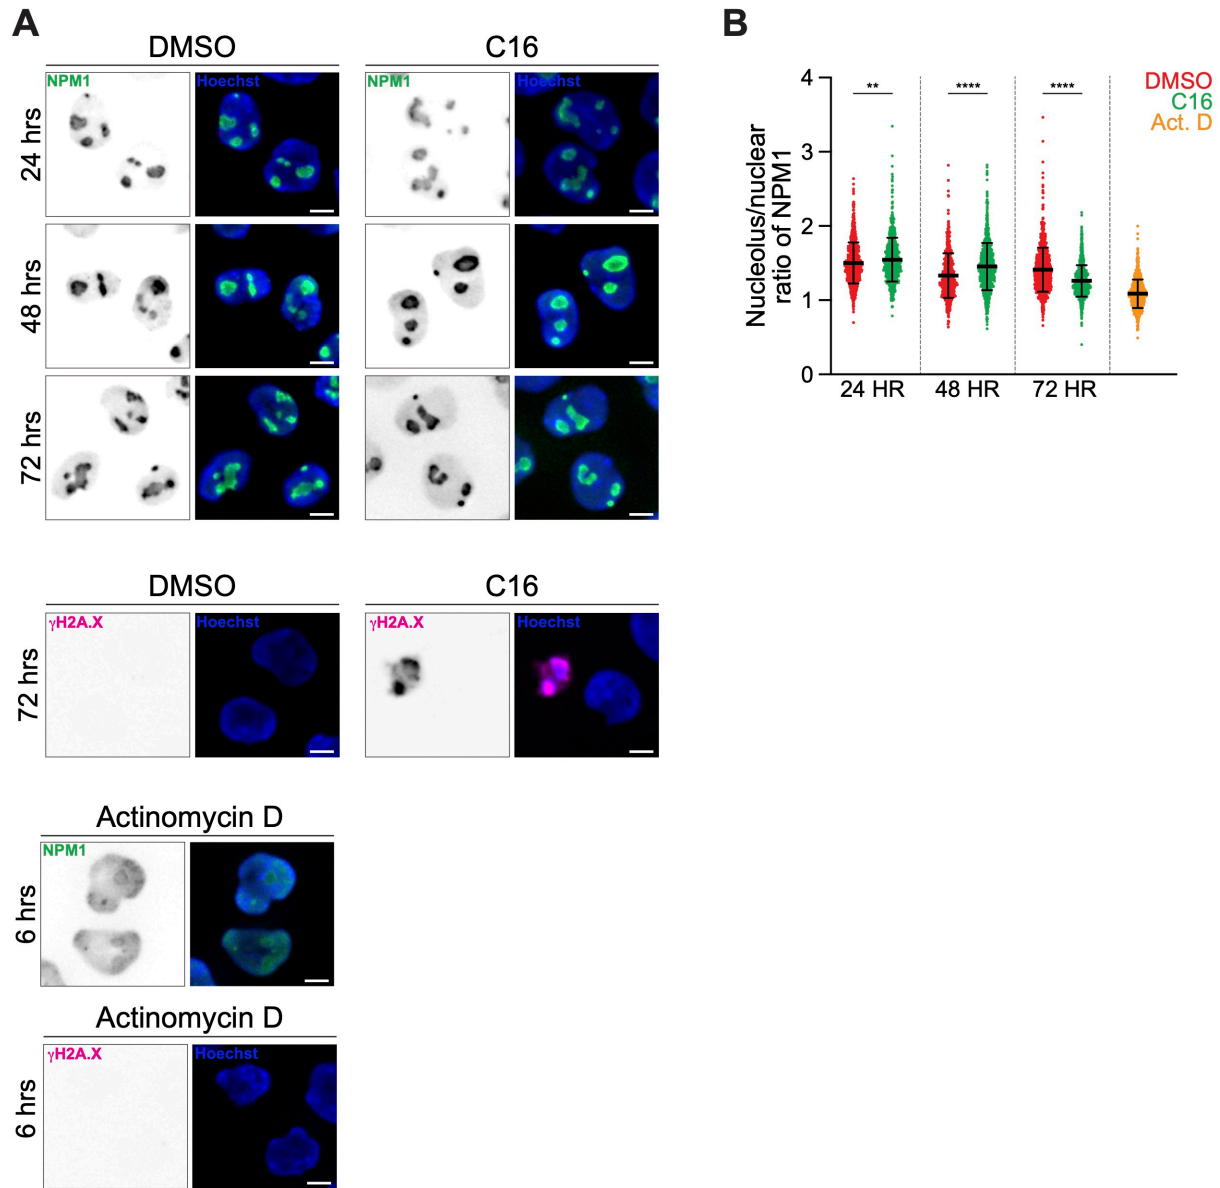

# Figure 4—figure supplement 1

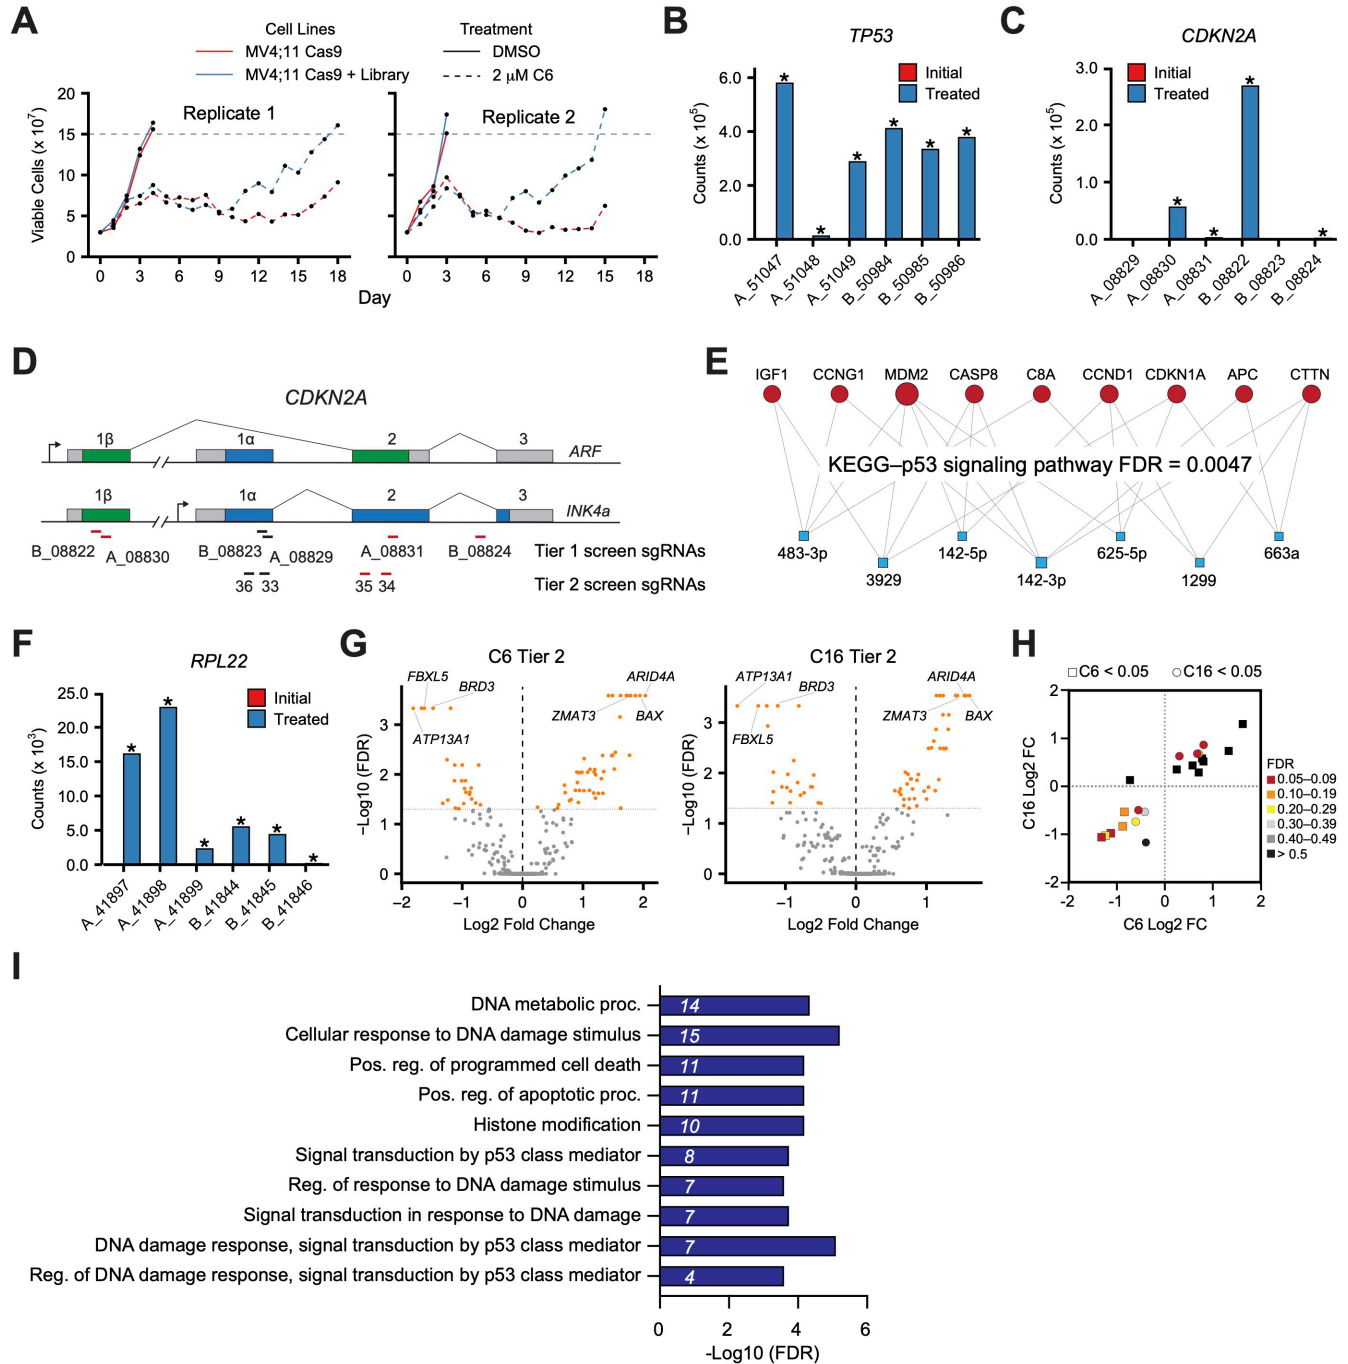



# Figure 5—figure supplement 1

**A**

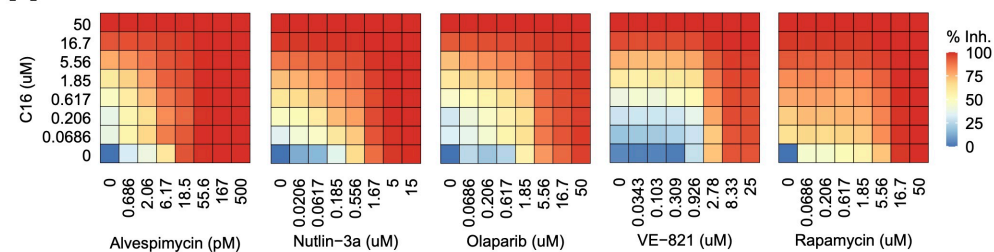

**B**

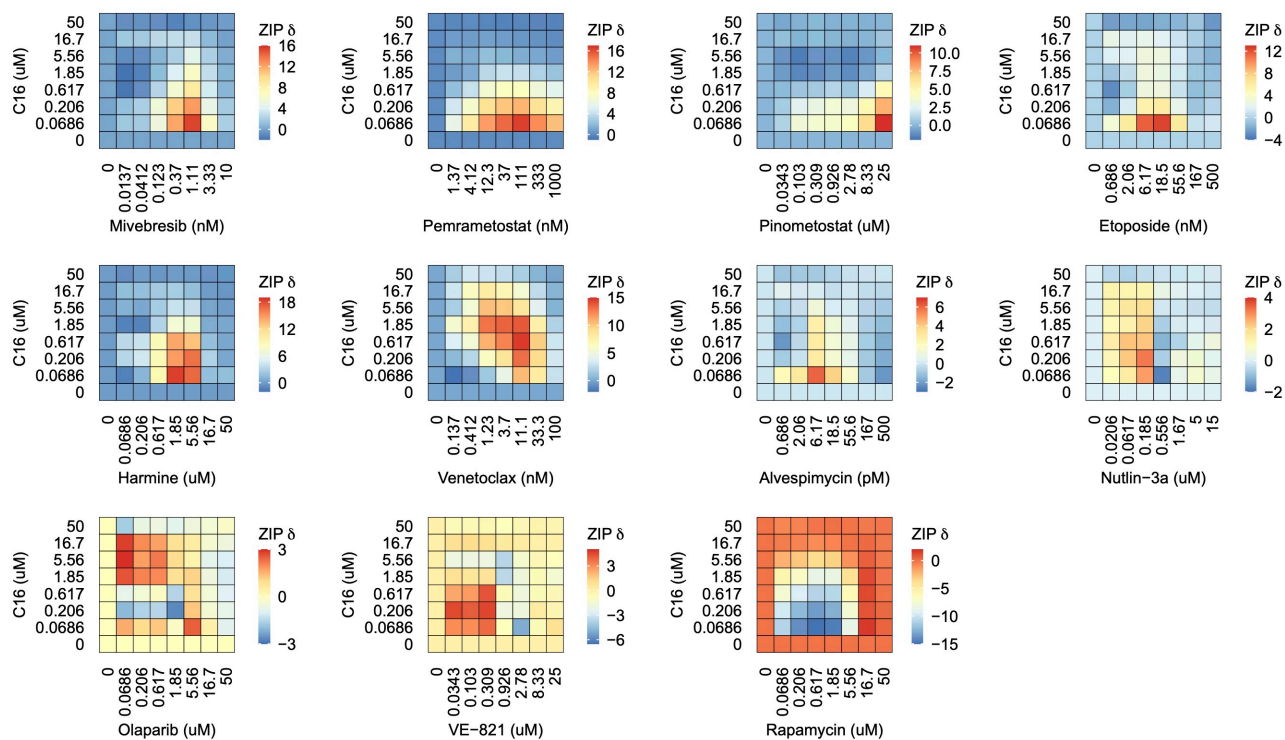

## Figure 5—figure supplement 2

**A**

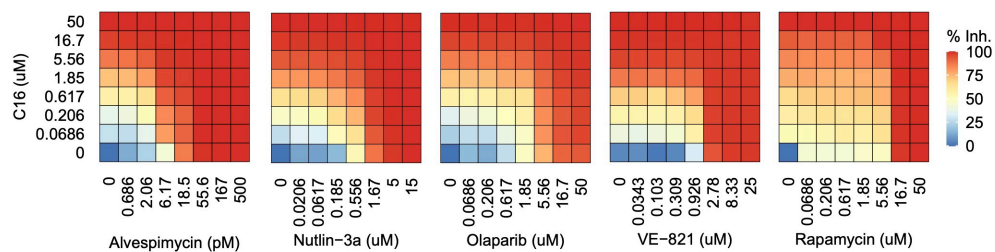

**B**

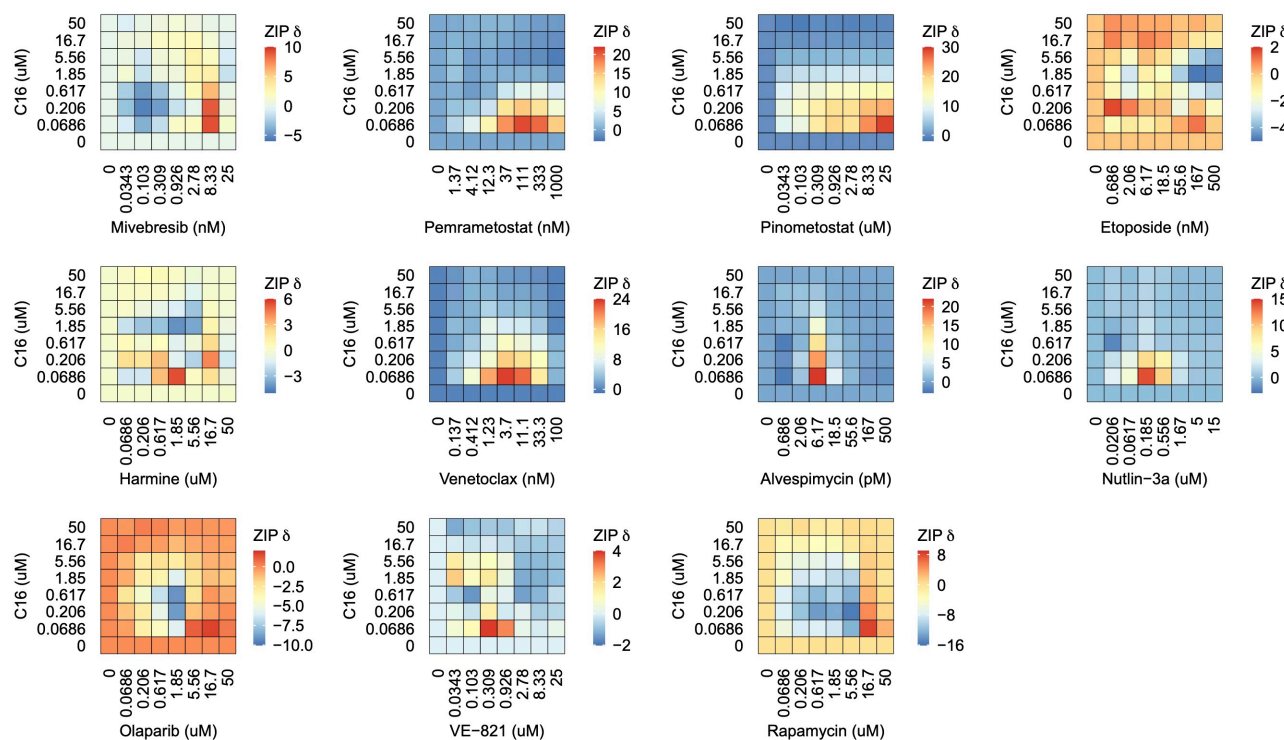

**Figure 5—figure supplement 3**

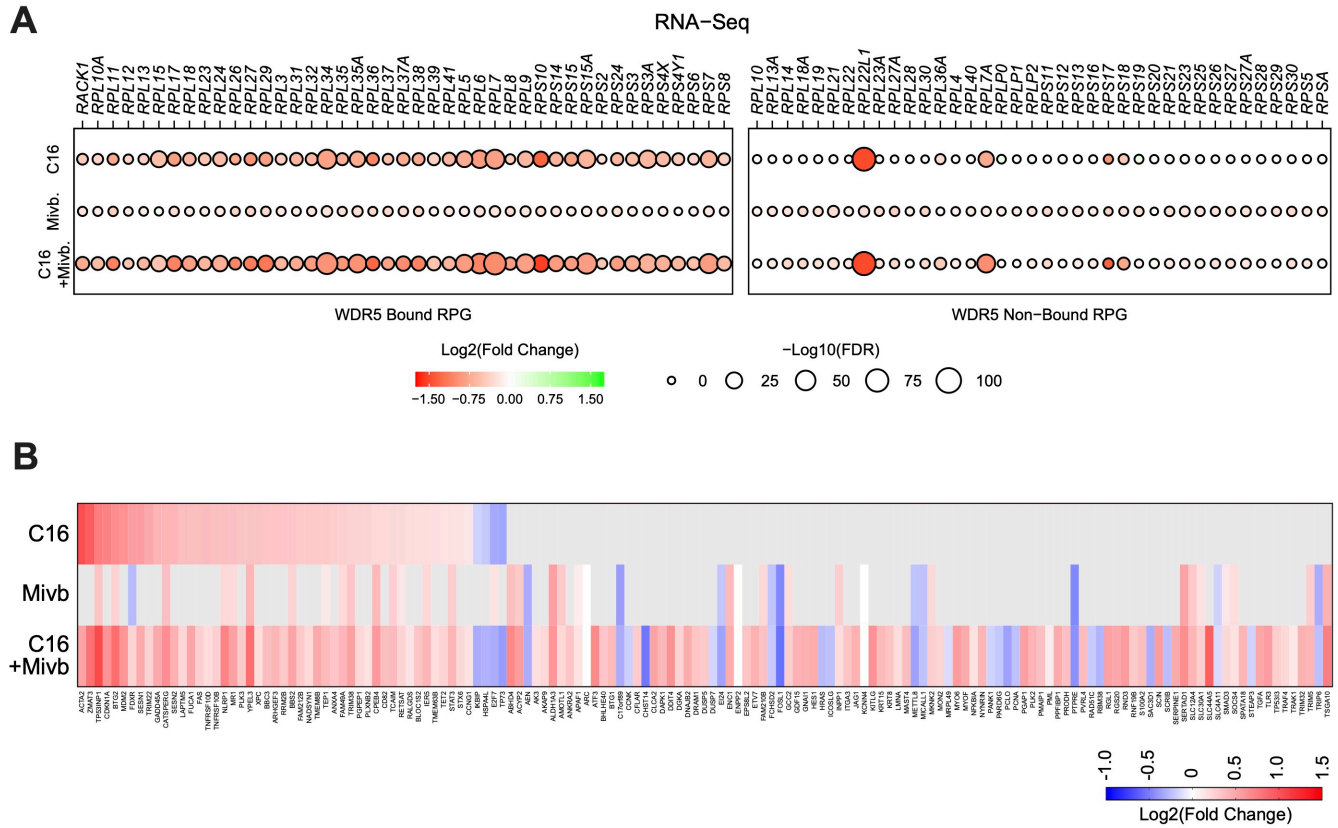

**Figure 6—figure supplement 1**

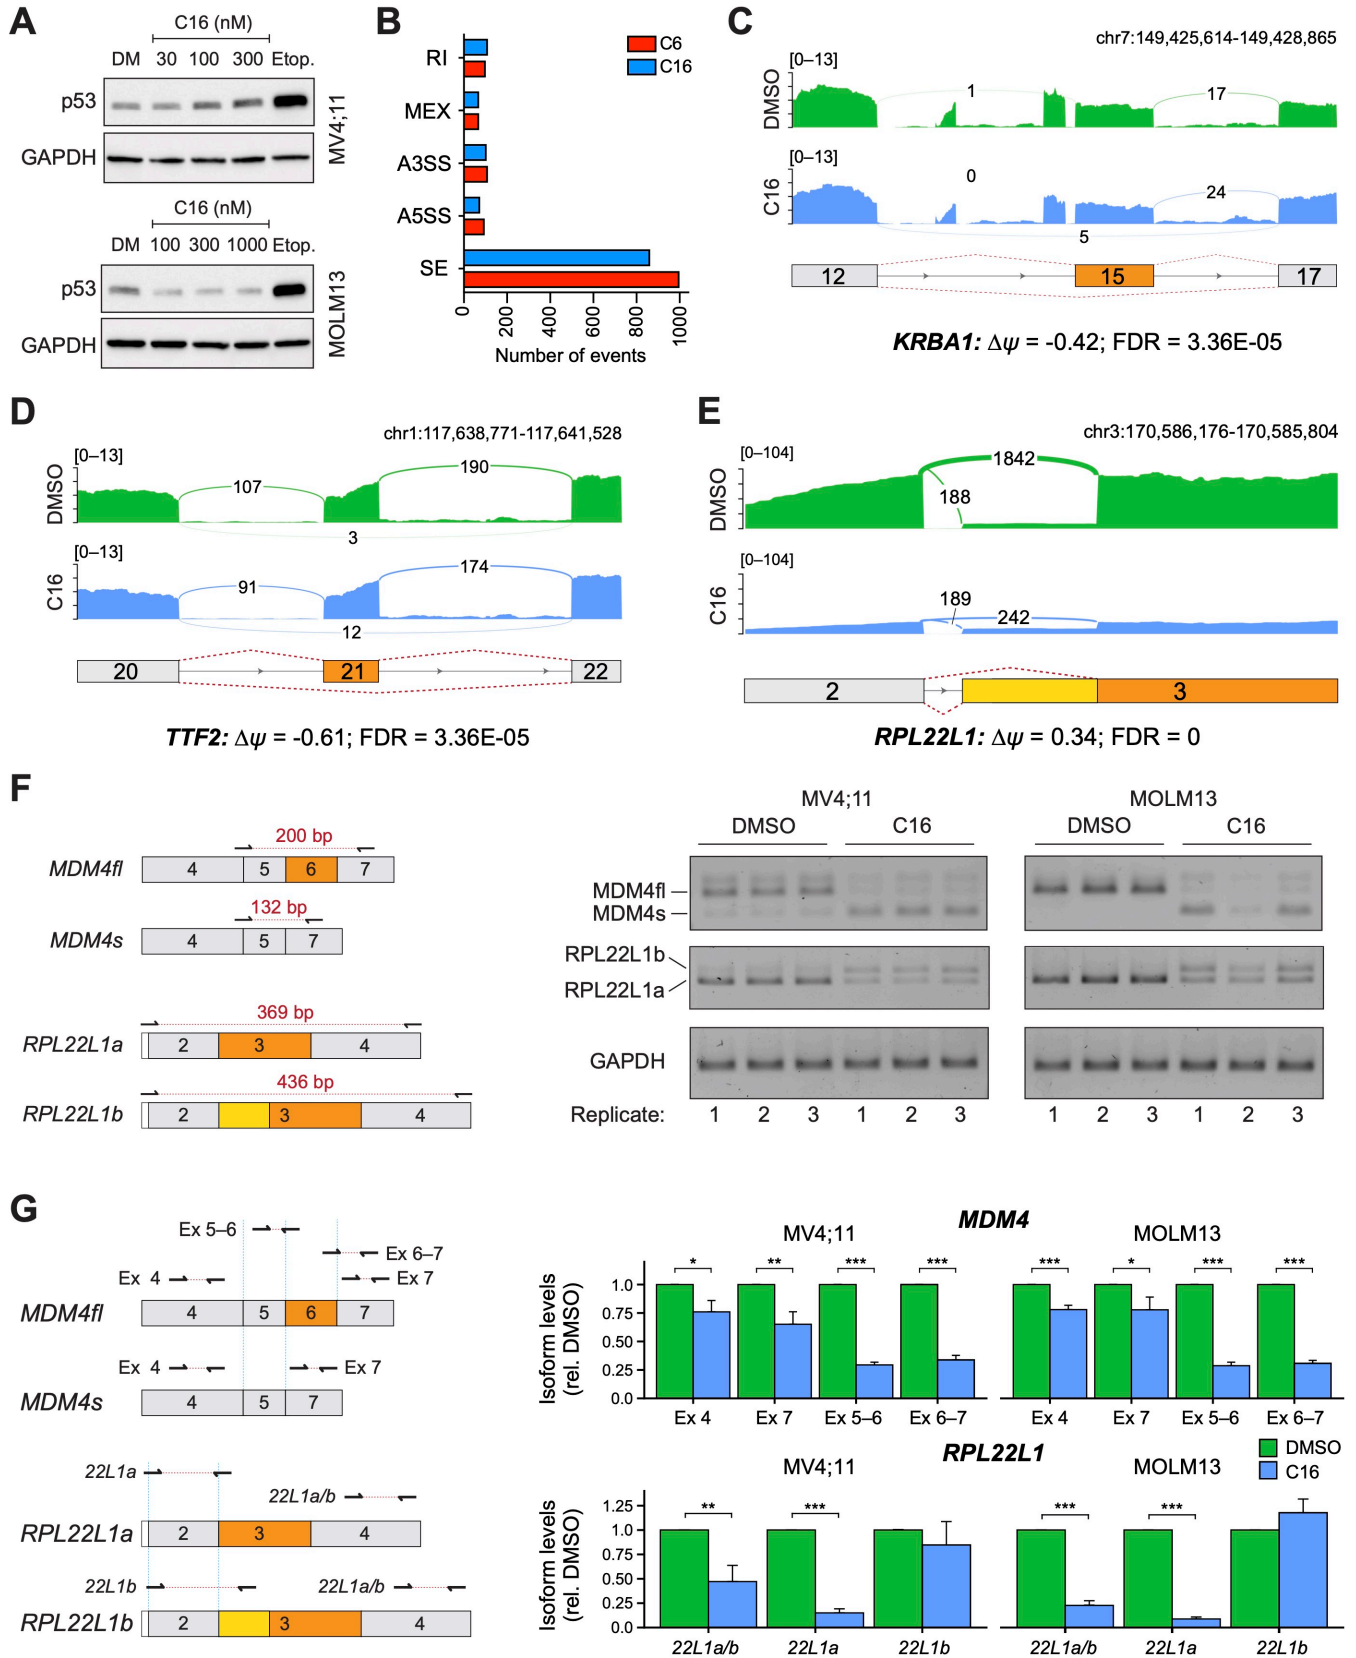

**Figure 6—figure supplement 2**

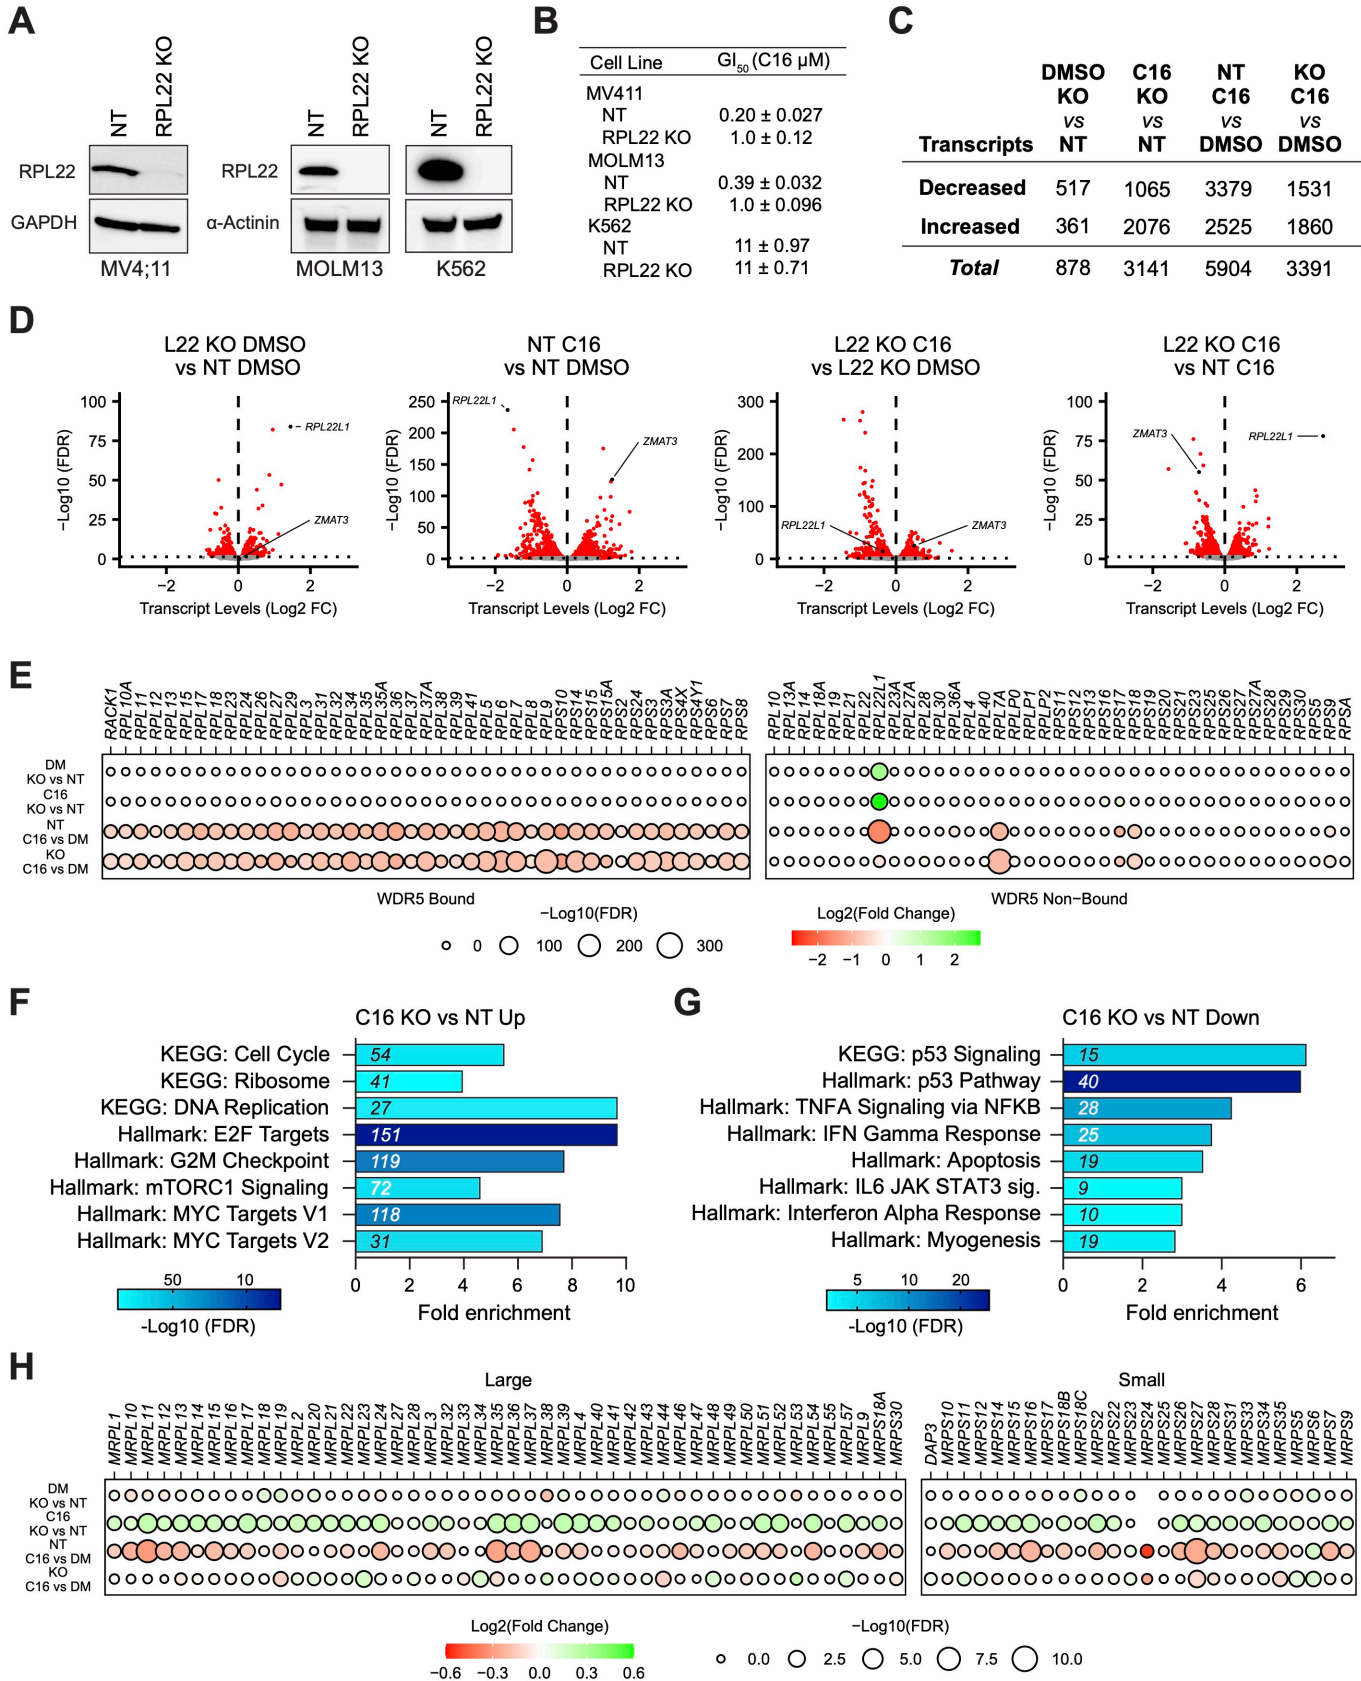



**Figure 6—figure supplement 3**

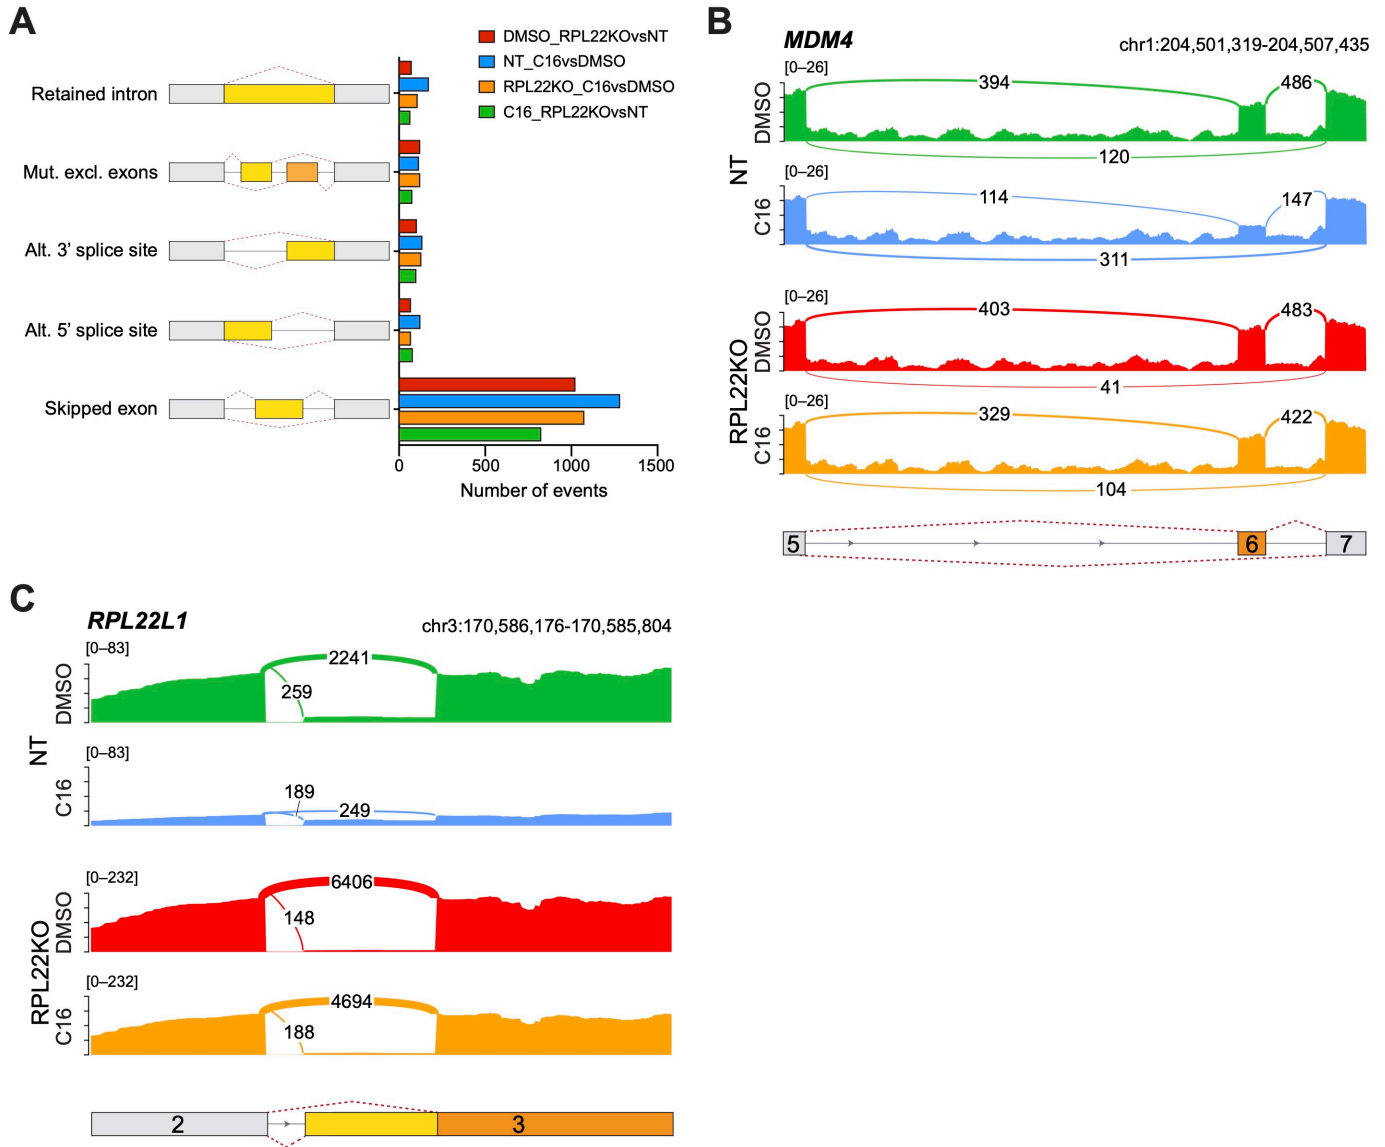

Supplement: NIHPP2023.07.26.550648v2-supplement-23.pdf [file NIHPP2023.07.26.550648v2-supplement-23.pdf]
