# Supplementary material
Source: PubMed Central journal article supplement (PMC10786465)

Figure 3- source data 3

MB 680R

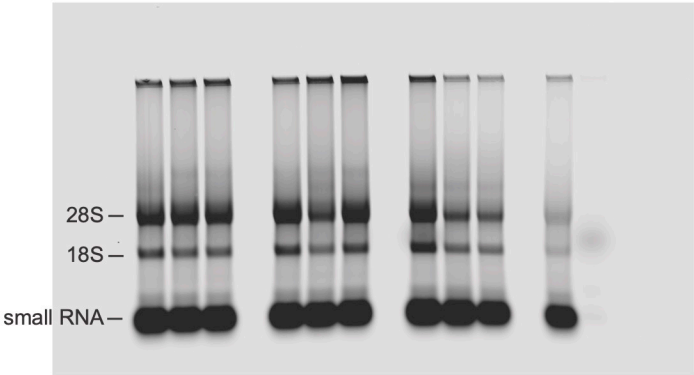

SYBR Safe

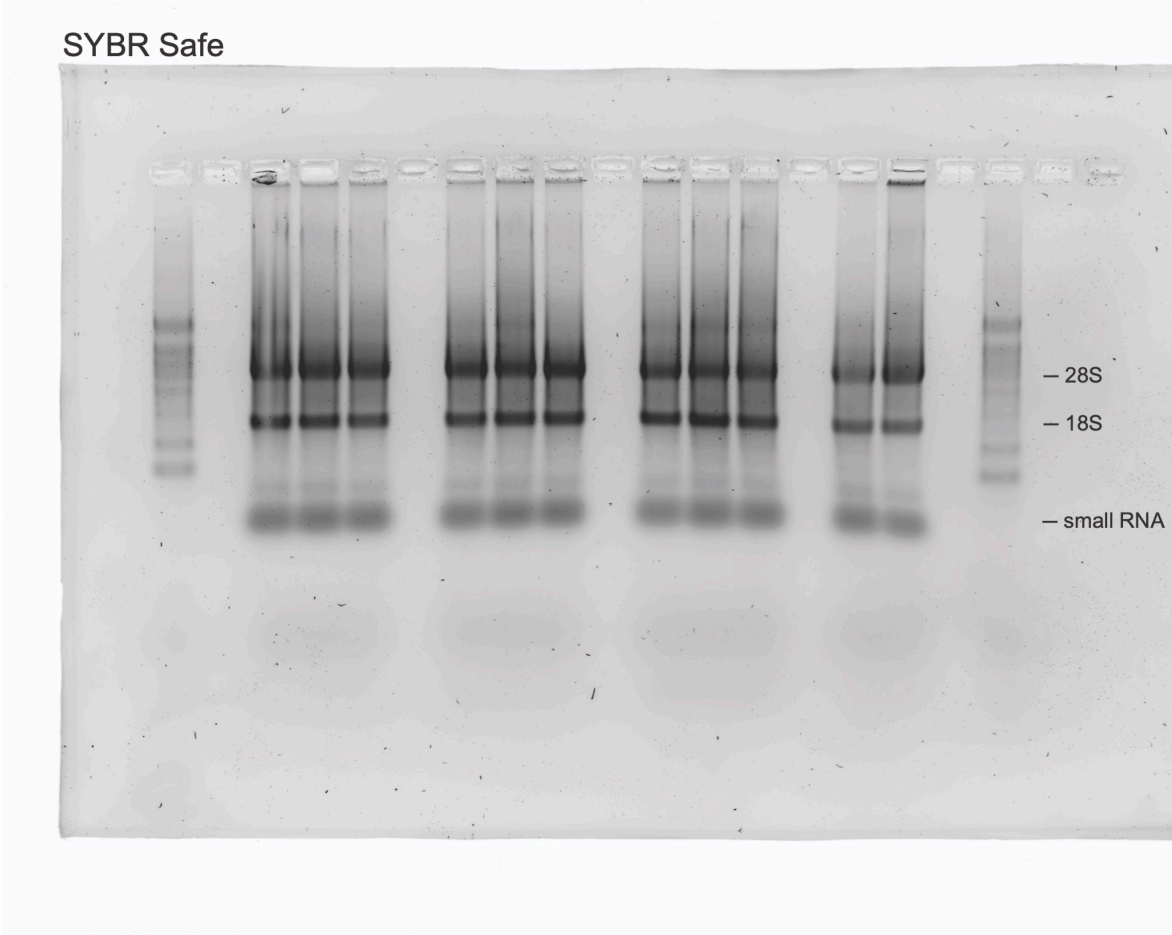

Supplement: media-17.pdf [file media-17.pdf]
