# Supplementary material
Source: PubMed Central journal article supplement (PMC10786465)

**Figure 6—source data 1**

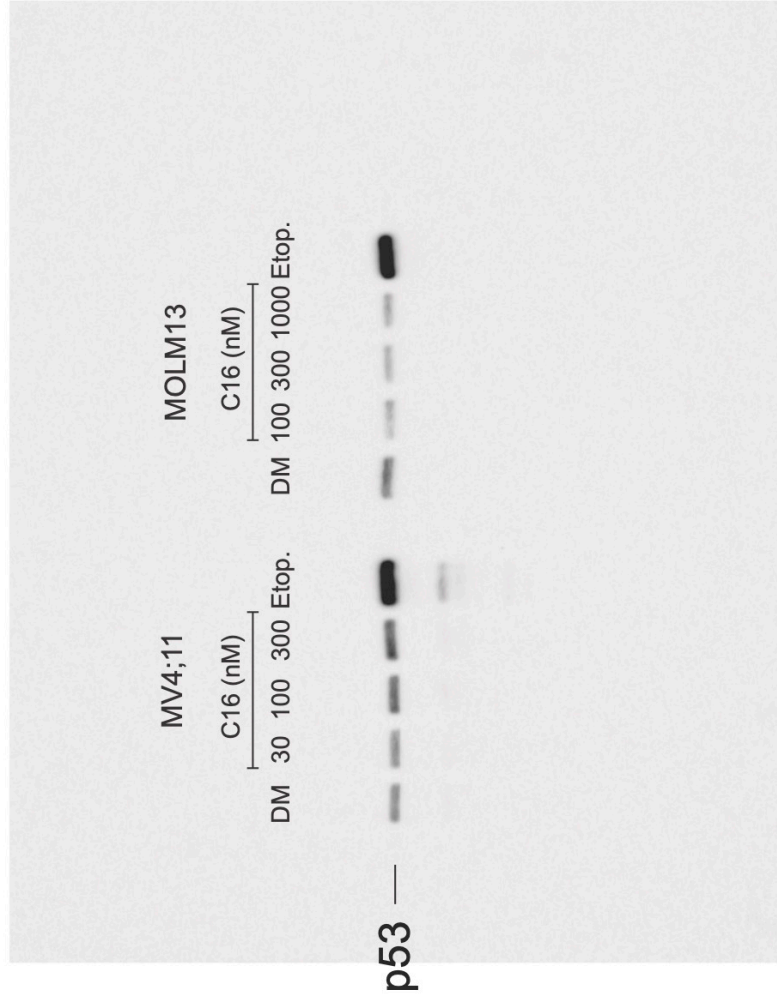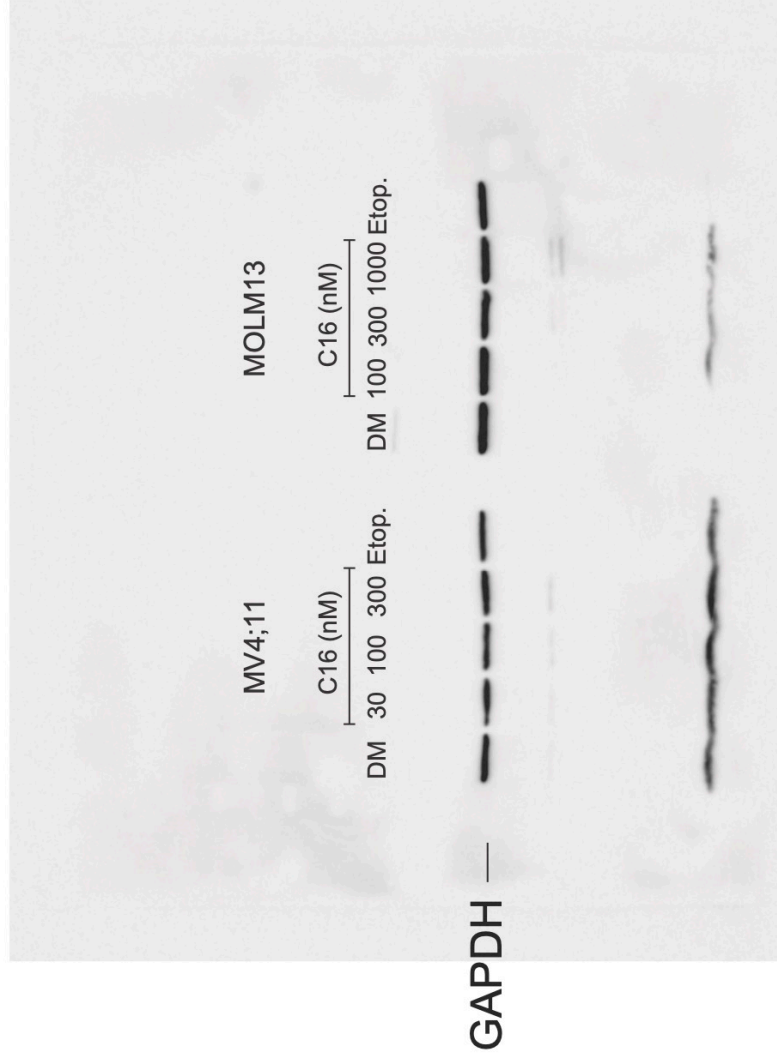

Supplement: media-18.pdf [file media-18.pdf]
