# Supplementary material
Source: PubMed Central journal article supplement (PMC10786465)

Figure 6—source data 3

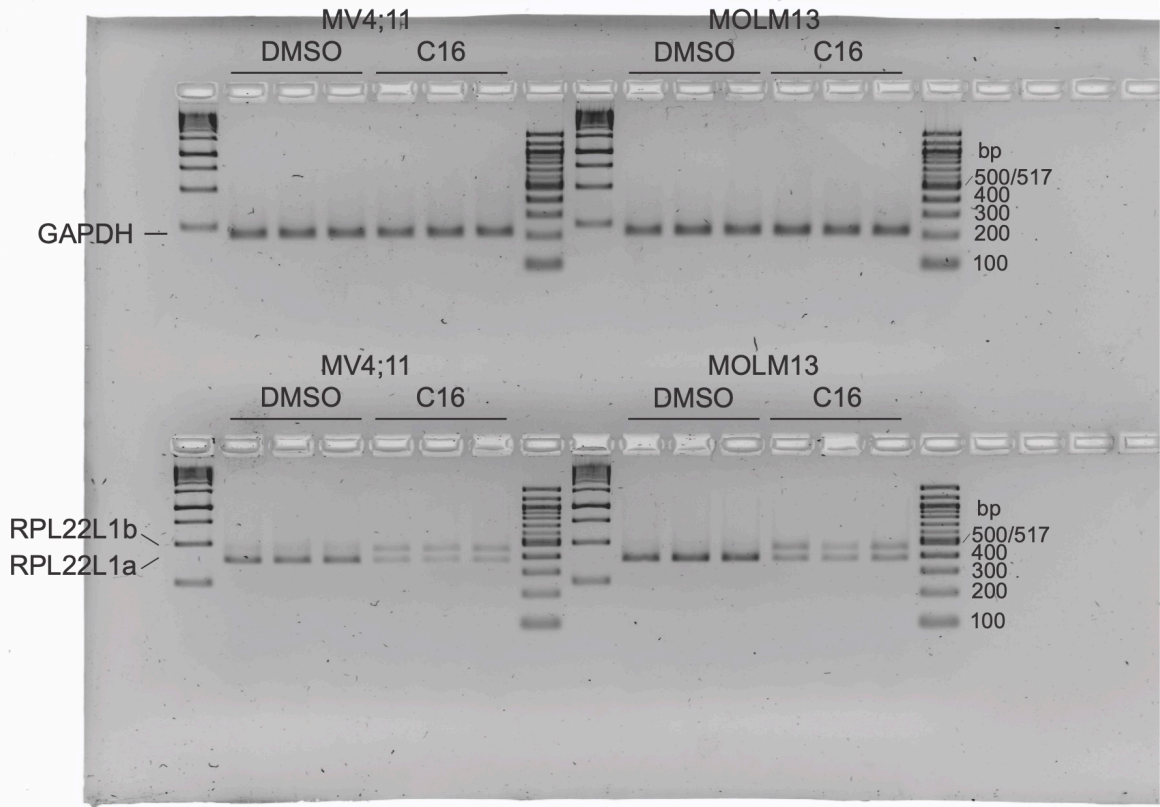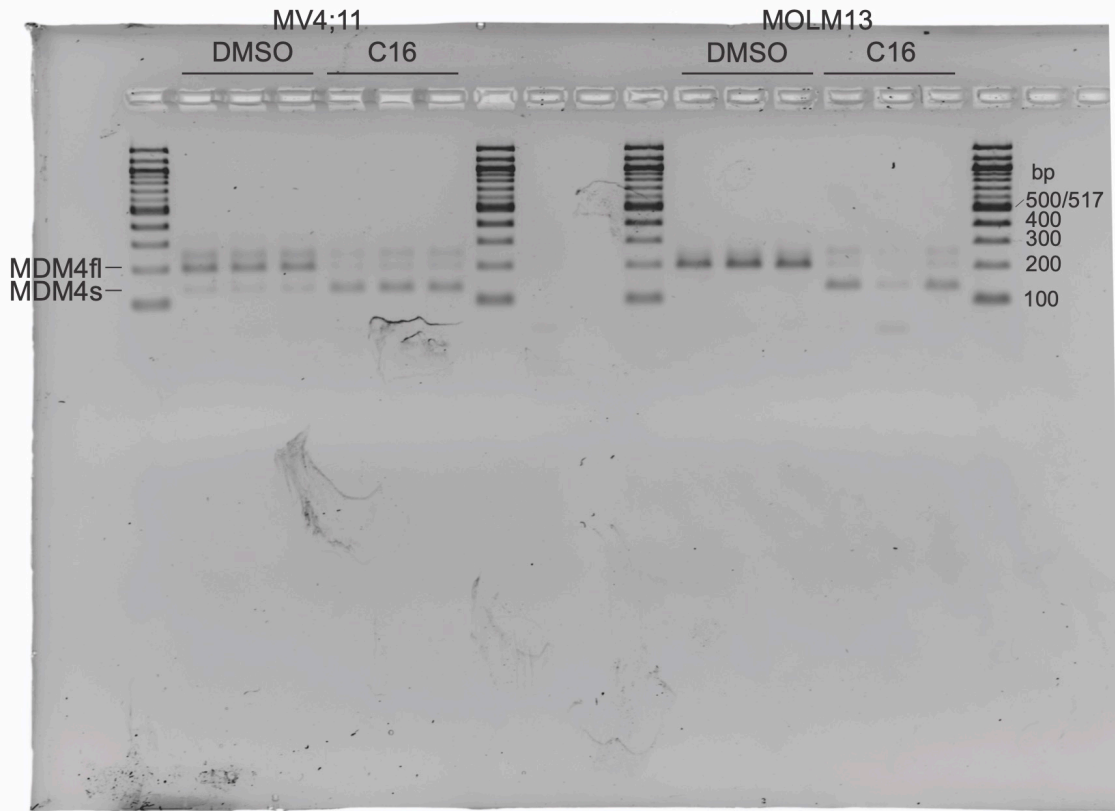

Supplement: media-19.pdf [file media-19.pdf]
