# Supplementary material
Source: PubMed Central journal article supplement (PMC10786465)

Figure 6—source data 4

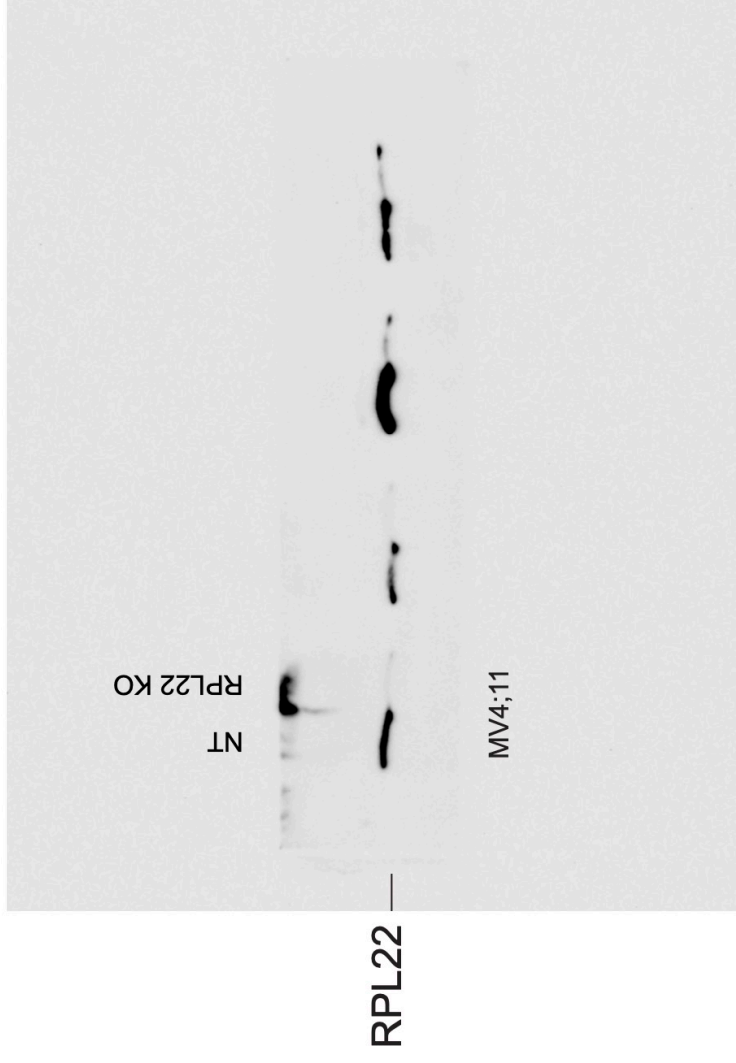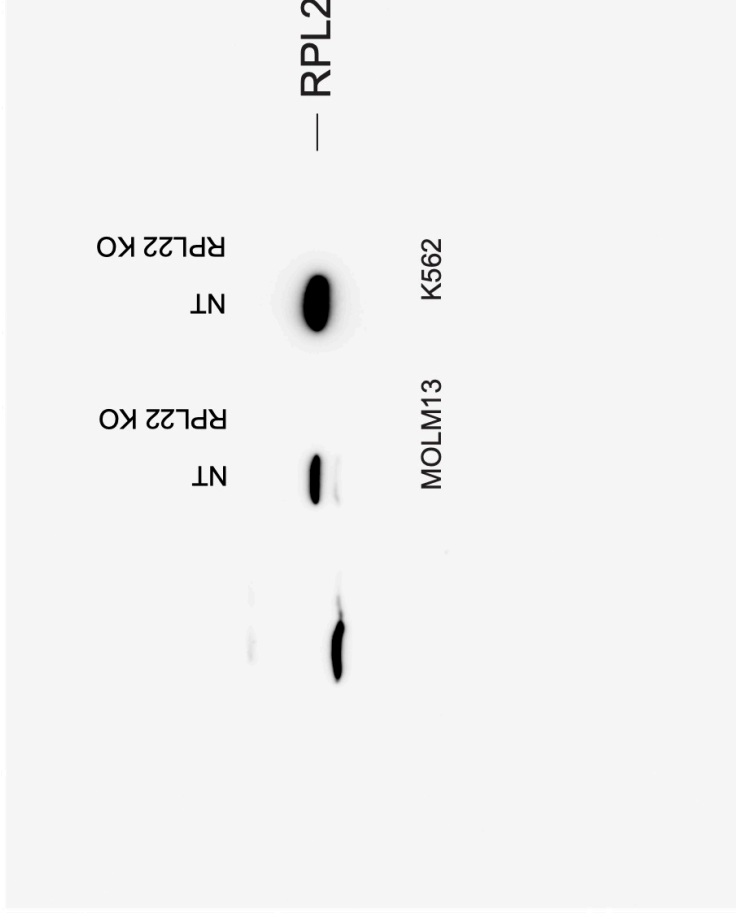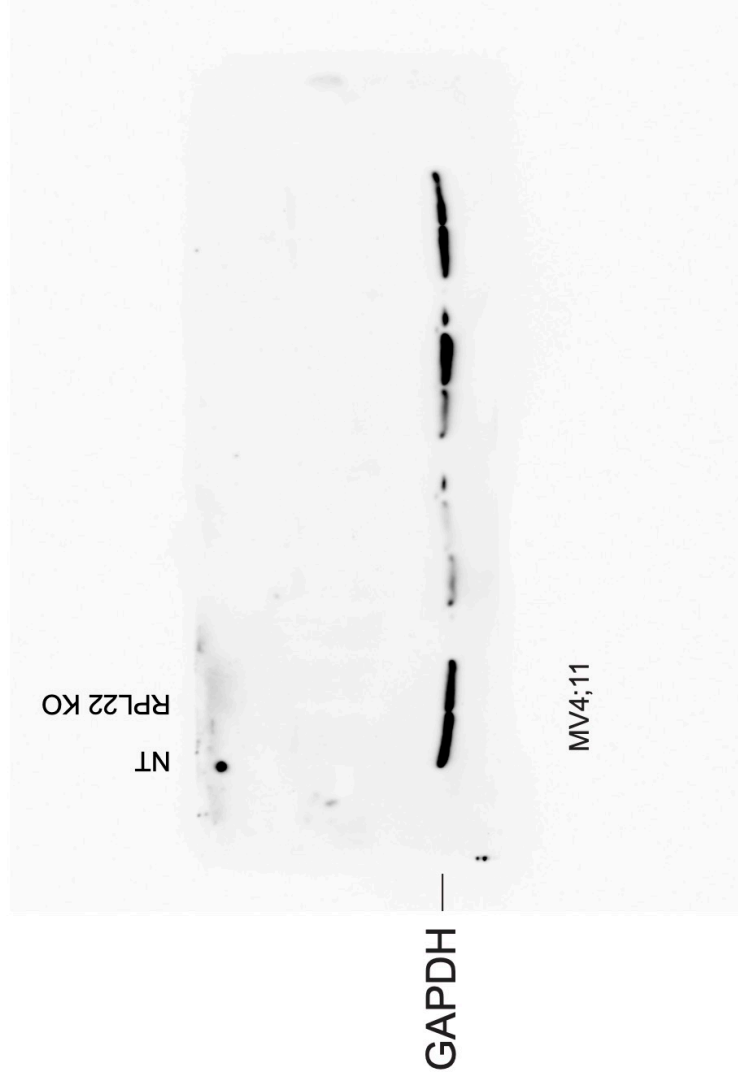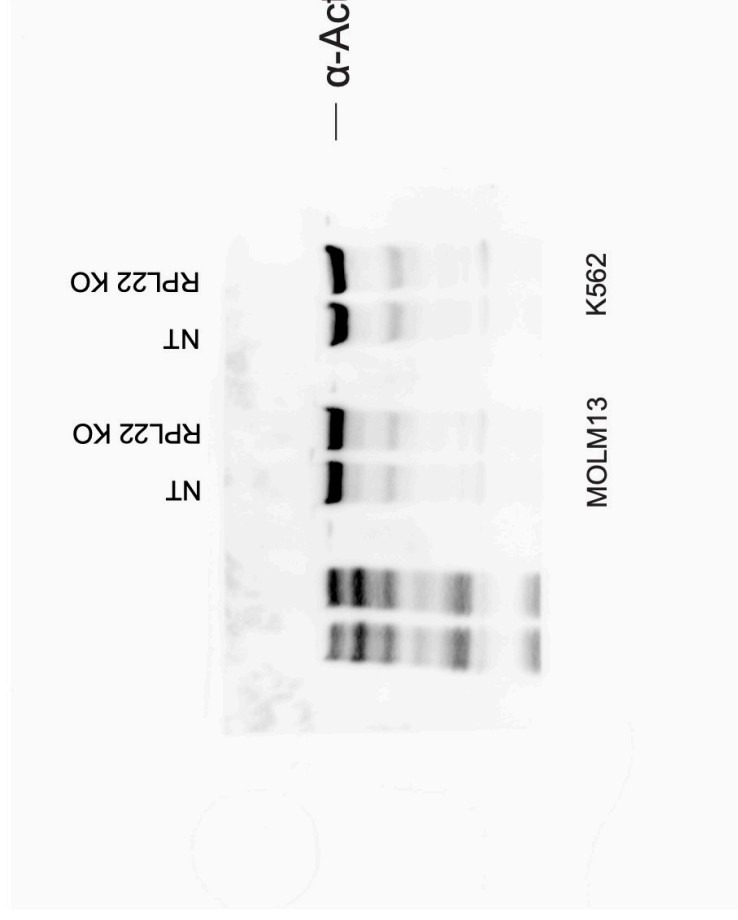

Supplement: media-20.pdf [file media-20.pdf]
