# Supplementary material
Source: PubMed Central journal article supplement (PMC10786465)

**Figure 6—source data 5**

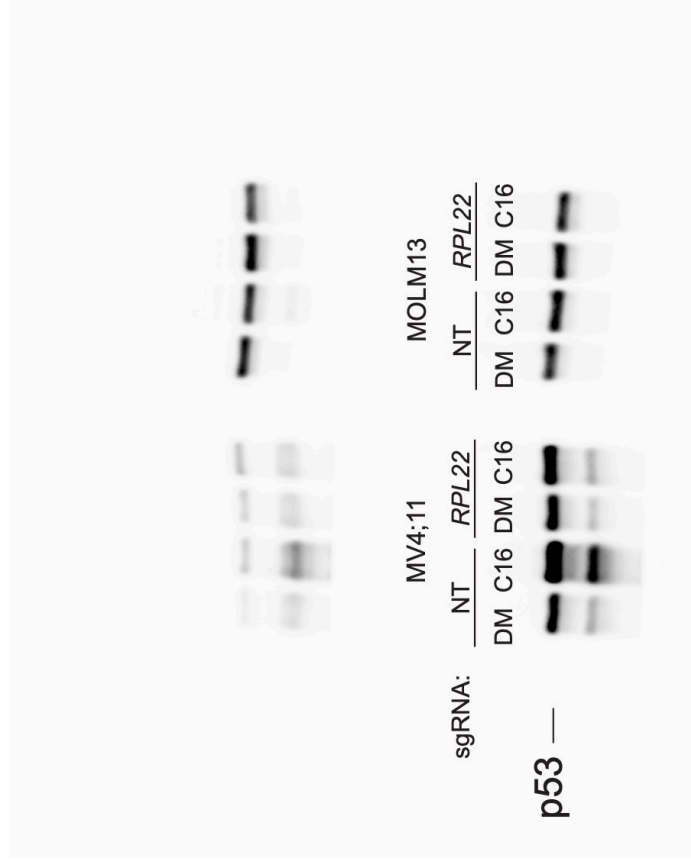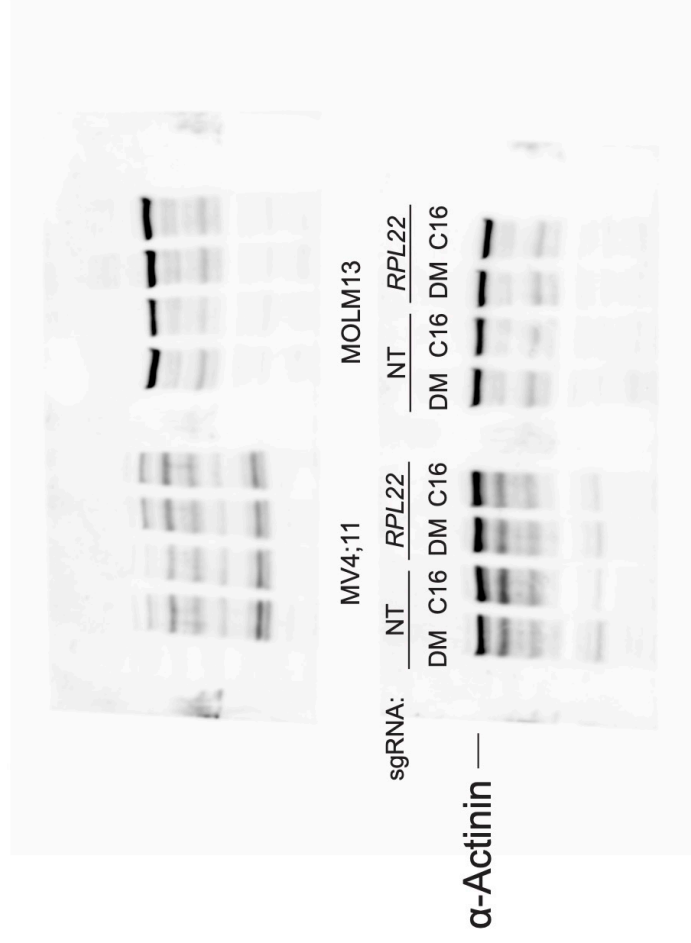

Supplement: media-21.pdf [file media-21.pdf]
