# Supplementary material
Source: PubMed Central journal article supplement (PMC10786465)

Figure 6—source data 9

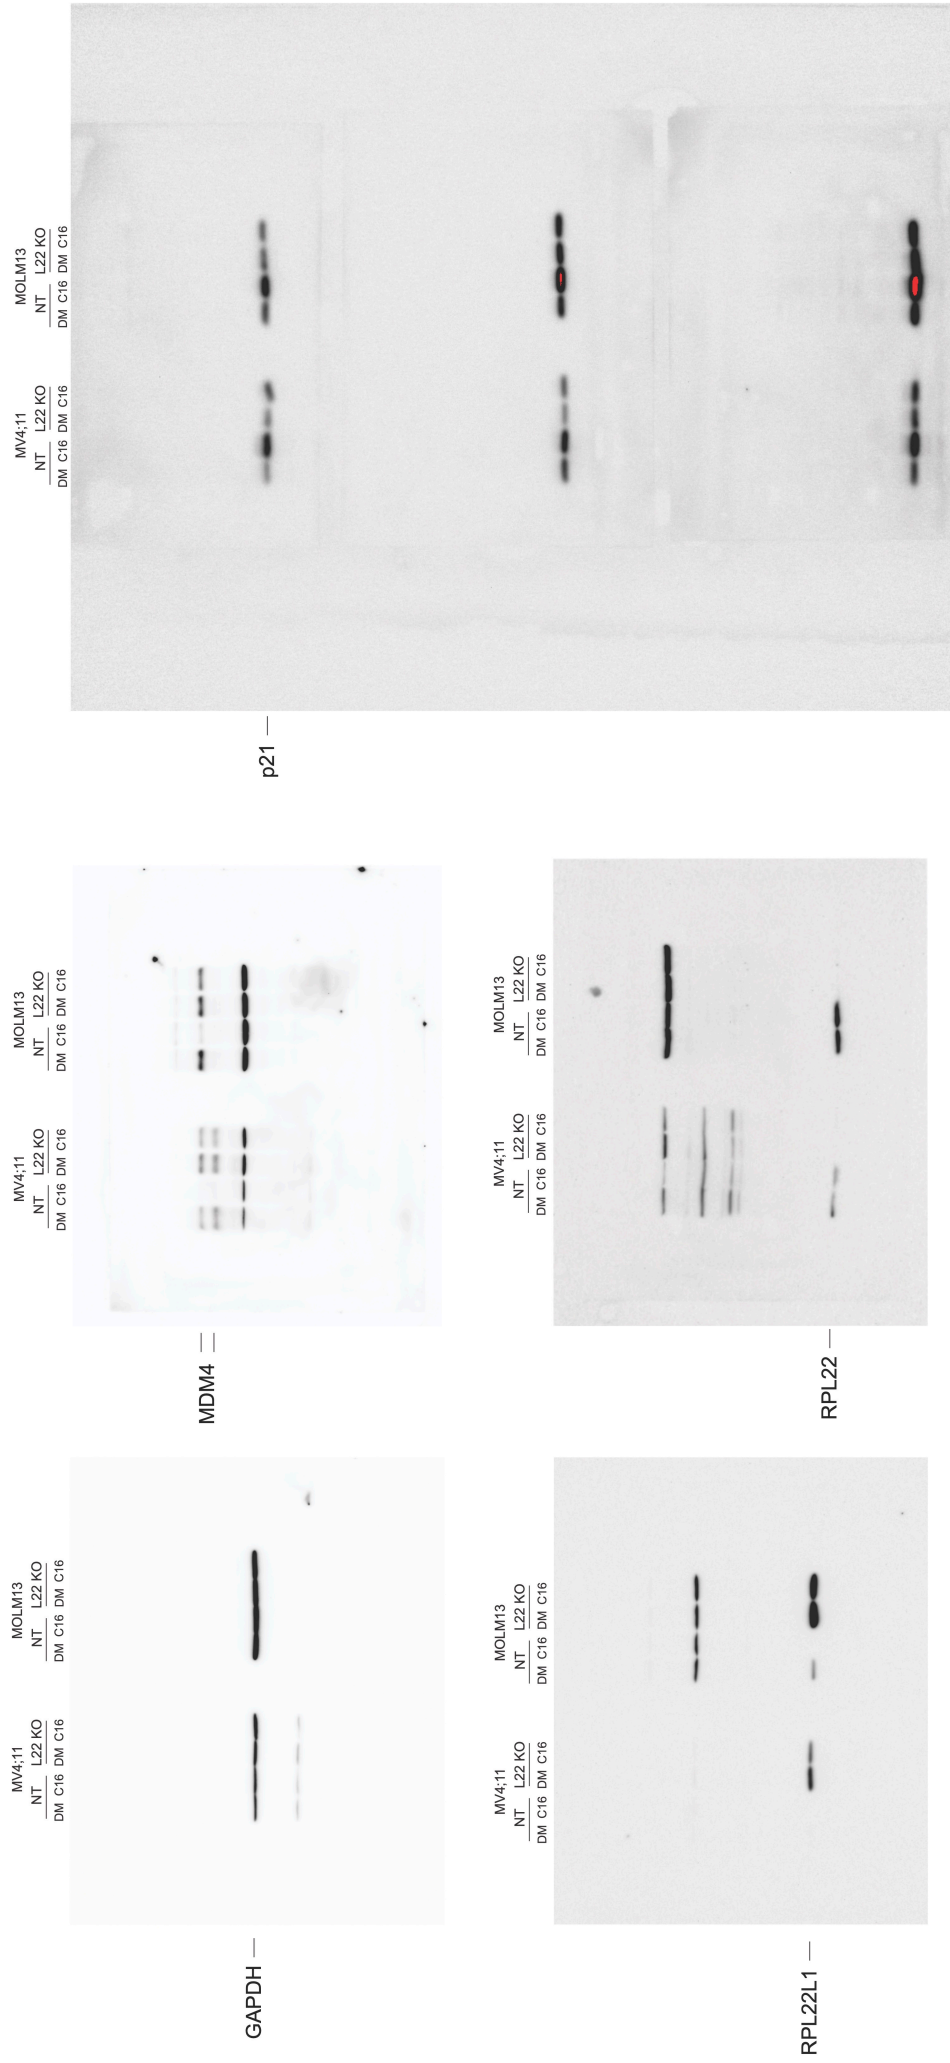

Supplement: media-22.pdf [file media-22.pdf]
